# Supplementary material for: Pharmacological or genetic inhibition of iNOS prevents cachexia‐mediated muscle wasting and its associated metabolism defects
Source: PubMed Central journal article supplement (PMC8261493; doi:10.15252/emmm.202013591), 2021-06-07
Supplement: EMMM-13-e13591-s003.pdf [file EMMM-13-e13591-s003.pdf]

**Appendix** Sadek et al. (EMM-2020-13591)

Appendix Figure S1 to S14 with figure legends

Appendix Table S1 to S19

## Appendix Figures

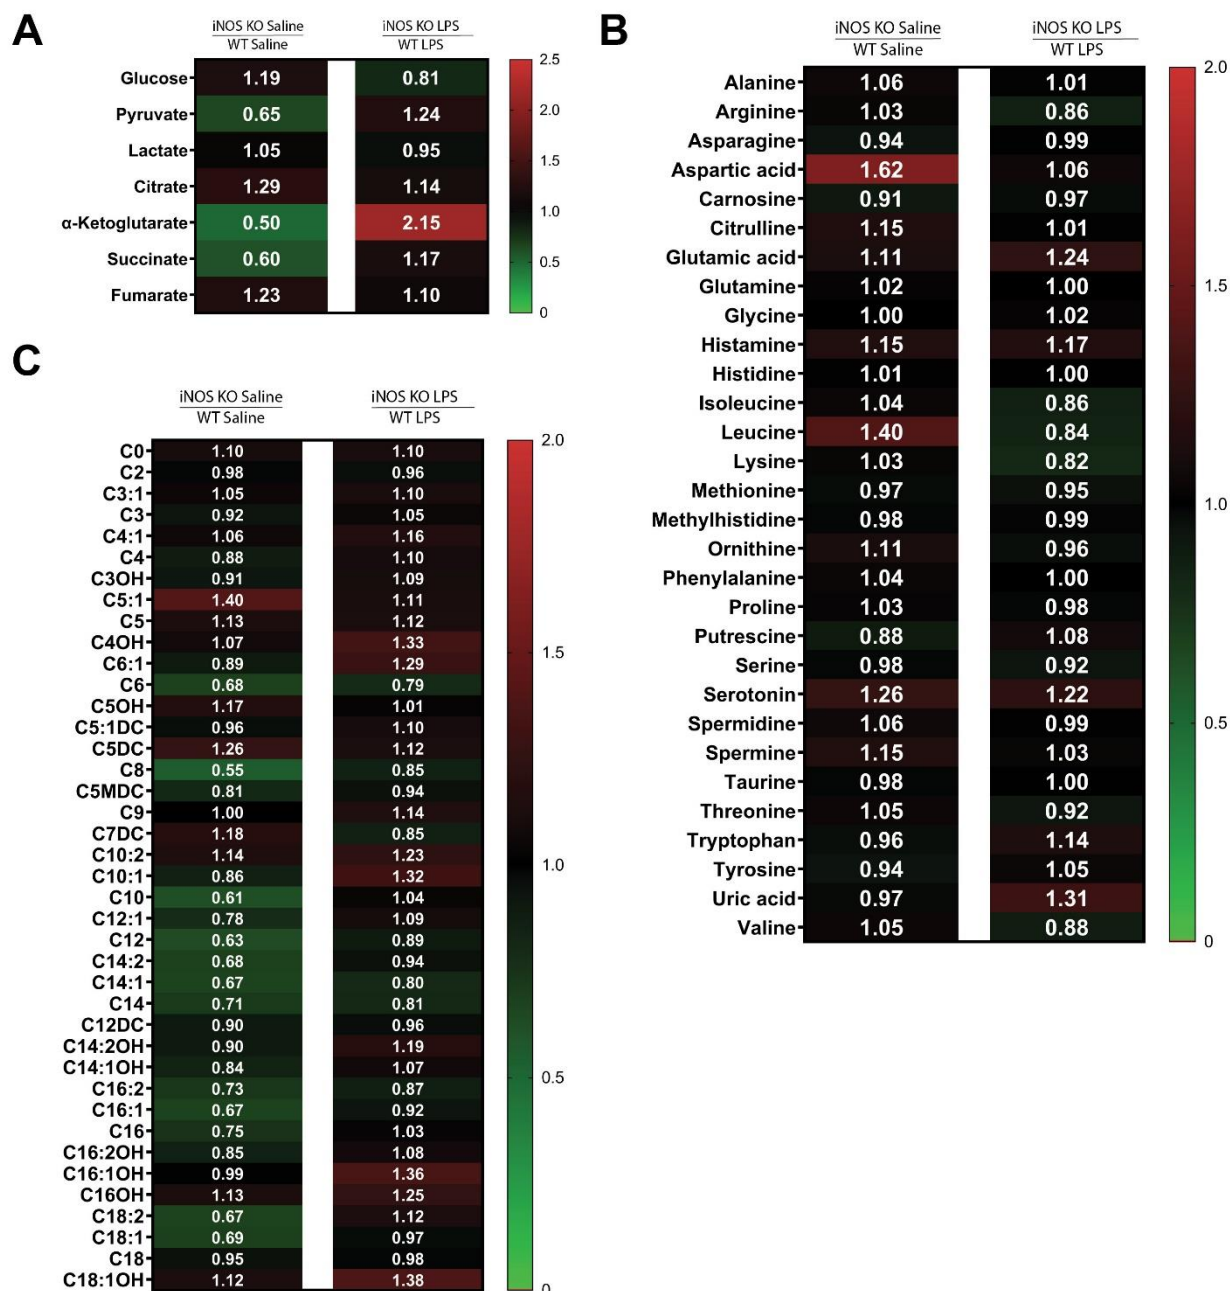

### Appendix Figure S1: Metabolite levels of iNOS KO mice compared to WT mice.

Male C57BL/6 wildtype (WT) and iNOS knockout (KO) mice were intraperitoneally injected with 1mg kg<sup>-1</sup> LPS or an equivalent volume of carrier solution. Saline treated WT and iNOS KO mice as well as the LPS-treated KO cohorts were pair-fed (PF) to the WT LPS-treated cohorts. After 18h, mice were euthanized and the metabolome of tibialis anterior muscles was analyzed through LC-MS/MS.

(A-C) Heatmap visualizing mean concentration of (A) metabolites involved in

Glycolysis and TCA cycle (B) amino acids and amino acid derivatives and (C) acylcarnitines relative to WT of each treatment group. Red and green indicate an increase or decrease in metabolite levels, respectively.

*Data information:* Individual data points represent values from individual mice, with a total of six mice per cohort (n = 6). Plotted concentration data was relativized to WT of corresponding treatment.

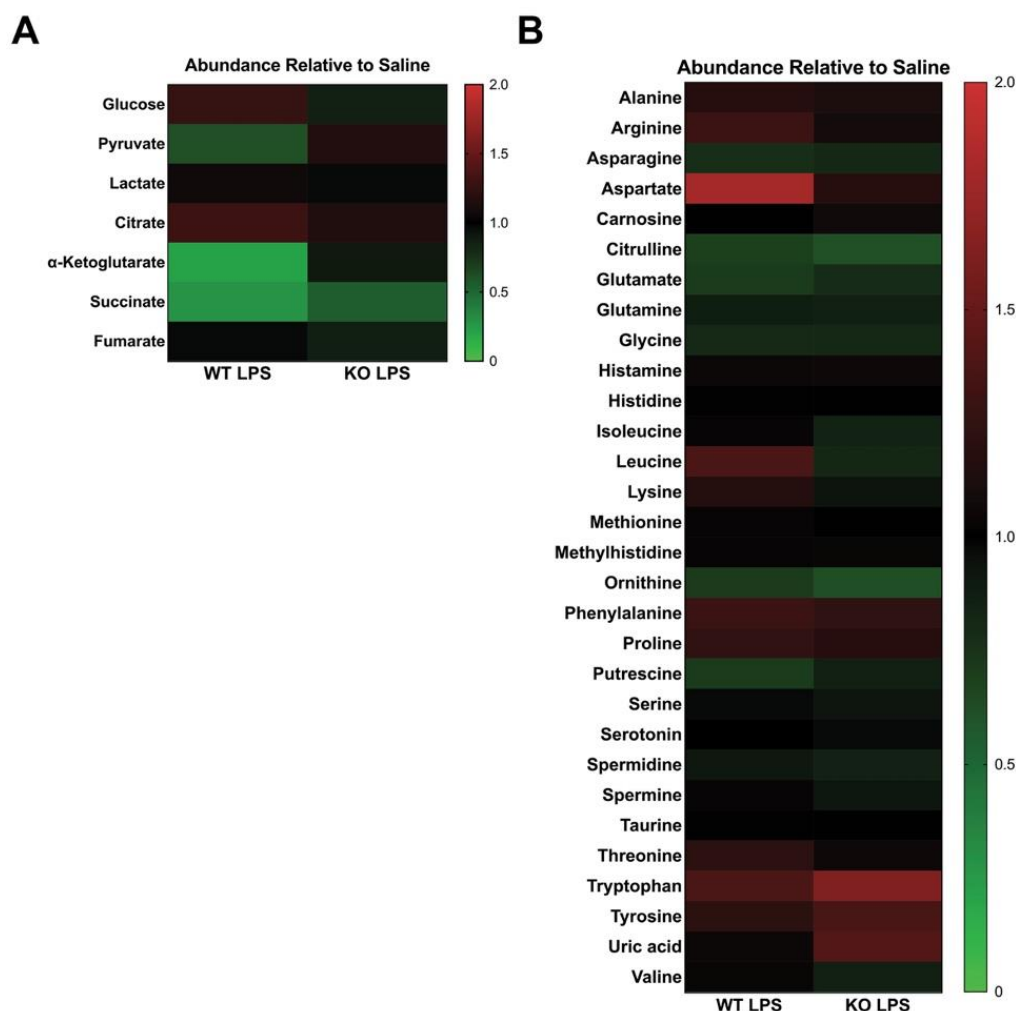

**Appendix Figure S2: Genetic ablation of iNOS prevents LPS-driven deregulation of the TCA cycle and amino acid metabolism.**

Male C57BL/6 wildtype (WT) and iNOS knockout (KO) mice were intraperitoneally injected with  $1\text{ mg kg}^{-1}$  LPS or an equivalent volume of carrier solution. Control WT, Control KO, and LPS-treated KO cohorts were pair-fed (PF) to the WT LPS-treated cohorts. After 18h, mice were euthanized and the metabolome of tibialis anterior muscles was analyzed through LC-MS/MS.

- (A) Heatmap visualizing mean concentration corresponding to metabolites involved in Glycolysis and TCA cycle relative to saline controls of each genotype. Red and green indicate an increase or decrease in metabolite levels, respectively.
- (B) Heatmap visualizing mean concentration of amino acids and amino acid derivatives relative to saline controls of each genotype. Red and green indicate an increase or decrease in metabolite levels, respectively.

*Data information:* Individual data points represent values from individual mice, with a total of six mice per cohort ( $n = 6$ ). Plotted concentration data was relativized to saline controls of corresponding genotype.

**A**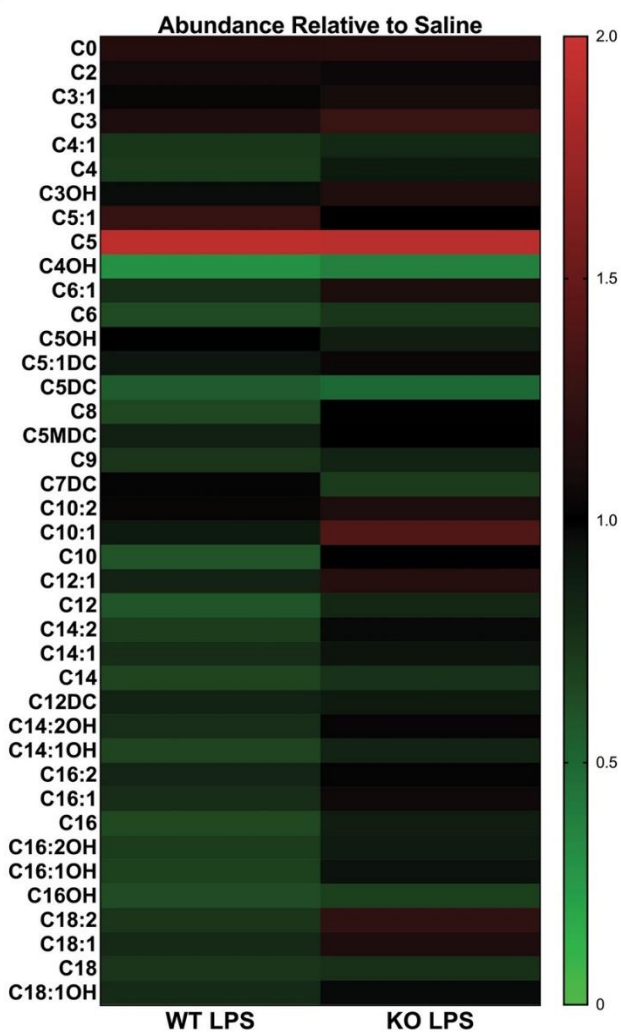

### Appendix Figure S3: Genetic ablation of iNOS prevents LPS-driven deregulation of the acylcarnitine metabolism.

Male C57BL/6 wildtype (WT) and iNOS knockout (KO) mice were intraperitoneally injected with  $1\text{ mg kg}^{-1}$  LPS or an equivalent volume of carrier solution. Control WT, Control KO, and LPS-treated KO cohorts were pair-fed (PF) to the WT LPS-treated cohorts. After 18h, mice were euthanized and the metabolome of tibialis anterior muscles was analyzed through LC-MS/MS.

(A) Heatmap visualizing mean concentration of acylcarnitines relative to saline controls of each genotype. Red and green indicate an increase or decrease in metabolite levels, respectively.

*Data information:* Individual data points represent values from individual mice, with a total of six mice per cohort ( $n = 6$ ). Plotted concentration data was relativized to saline controls of corresponding genotype.

**A**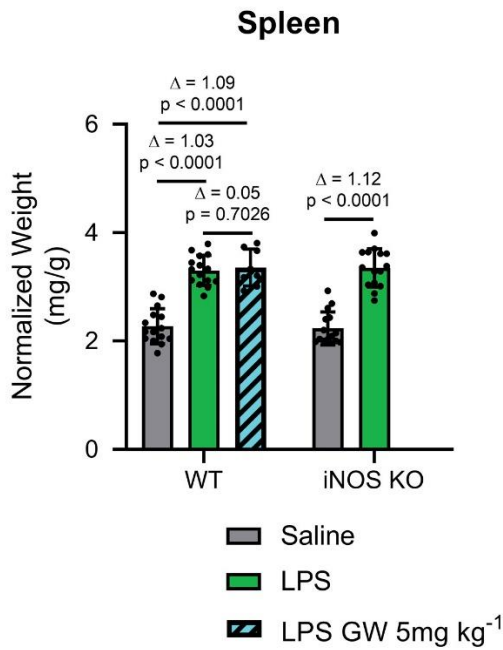**B**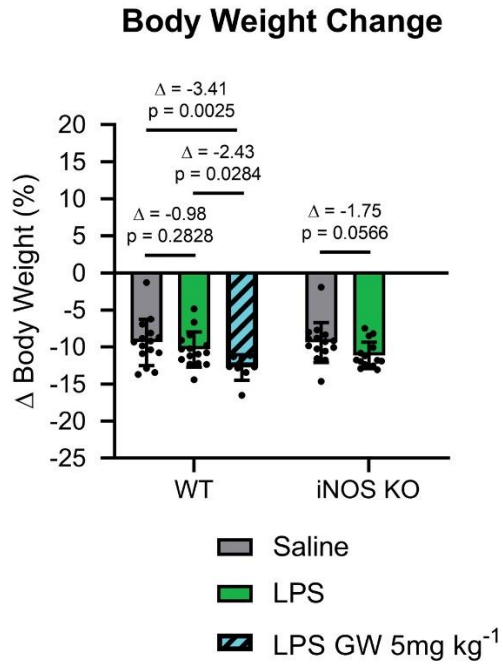**C**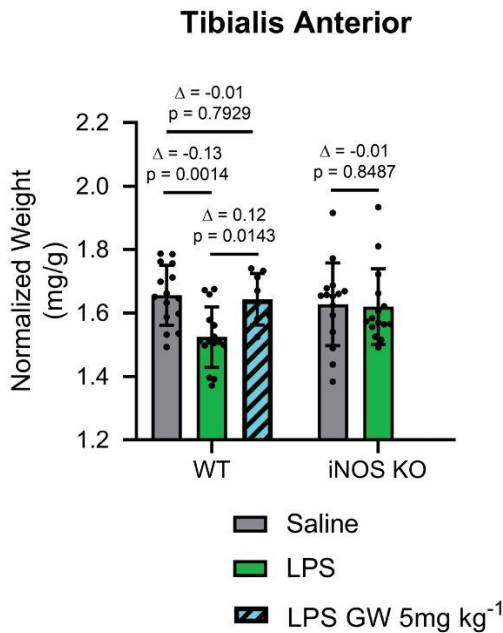**D**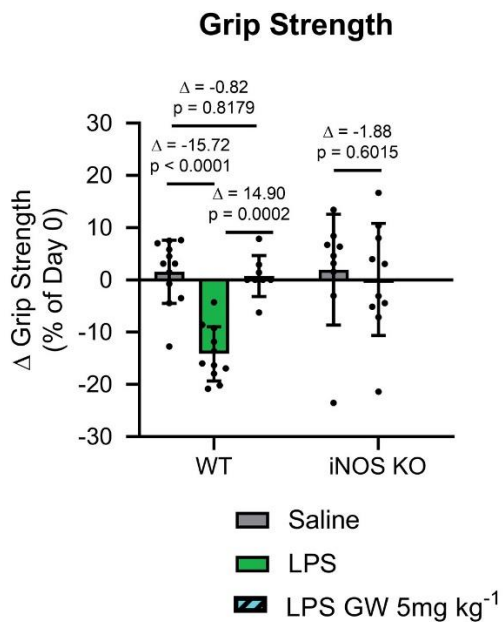

**Appendix Figure S4: Pharmacological inhibition of iNOS prevents LPS-driven muscle wasting.**

Male C57BL/6 wildtype (WT) and iNOS knockout (KO) mice were intraperitoneally injected with saline, 1mg kg<sup>-1</sup> LPS or 5mg kg<sup>-1</sup> of GW and LPS. Data was compared to previously

shown data in Figures 1D, 1H, EV1A, and EV2A from Control WT, Control KO, and LPS-treated WT and KO cohorts. After 18h, mice were euthanized, and tissue samples were analyzed.

- (A) Spleen weight normalized to initial body weight. (WT saline n=15, WT LPS n=15, WT LPS+GW n=8, iNOS KO saline n=15, and iNOS KO LPS n=15).
- (B) Percent body weight change from time of injection to endpoint of experiment. (WT saline n=15, WT LPS n=15, WT LPS+GW n=8, iNOS KO saline n=15, and iNOS KO LPS n=15).
- (C) Tibialis anterior weight normalized to initial body weight. (WT saline n=15, WT LPS n=15, WT LPS+GW n=8, iNOS KO saline n=15, and iNOS KO LPS n=15).
- (D) Change in grip strength from before injection and before endpoint collection. (WT saline n=12, WT LPS n=11, WT LPS+GW n=8, iNOS KO saline n=9, and iNOS KO LPS n=10).

*Data information:* Data from Control WT, Control KO, and LPS-treated WT and KO cohorts are those shown in Figures 1D, 1H, EV1A, and EV2A and compared to WT LPS and GW-treated mice. Individual data points represent values from individual mice. Error bars represent the standard deviation (SD) of the mean. For statistical comparisons,  $\Delta$  indicates the difference of mean values and p-values were calculated with an ANOVA followed by Fisher's LSD test.

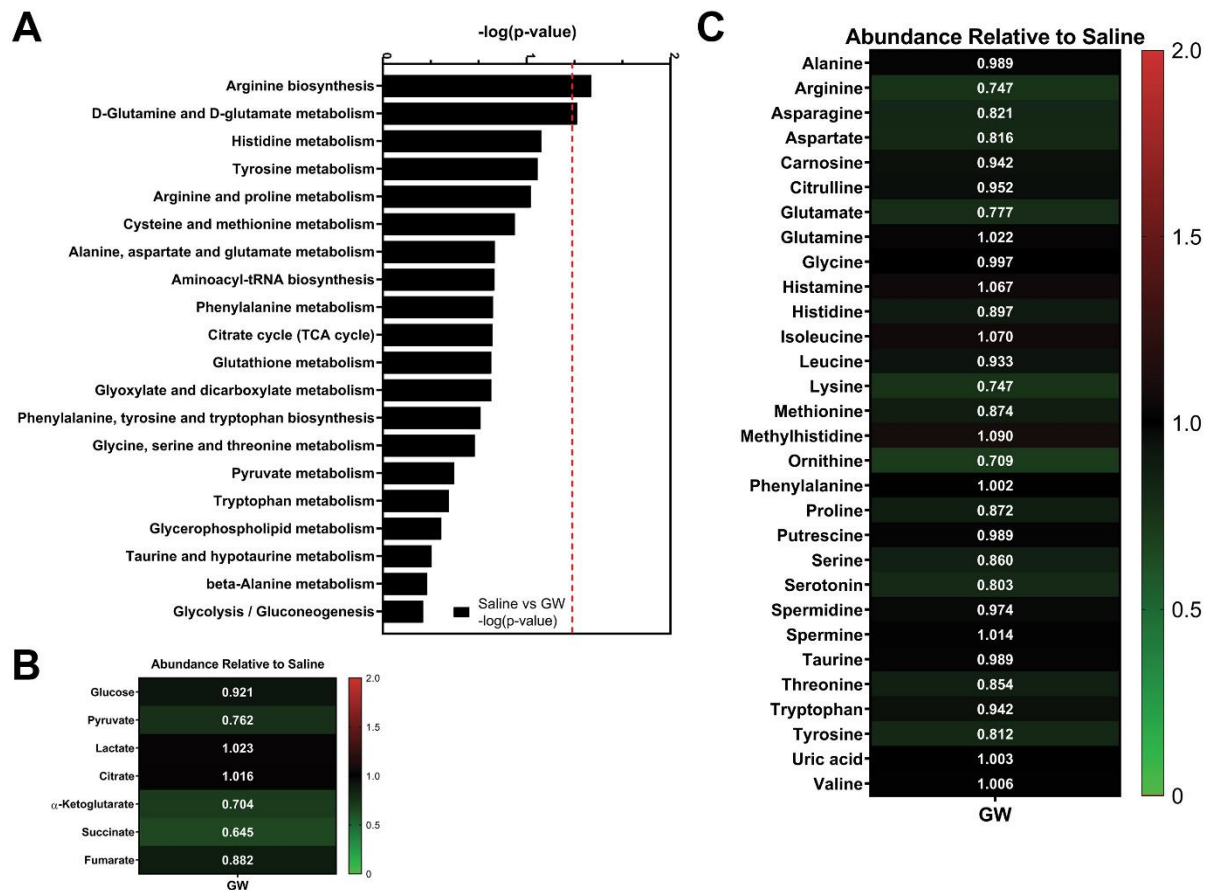

### Appendix Figure S5: Characterization of GW-induced metabolome alterations.

Male BALB/C mice were injected subcutaneously with saline. After 5 days and everyday thereafter, the mice were injected with either saline or GW 5mg kg<sup>-1</sup>. After 16 days, mice were euthanized and the metabolome of tibialis anterior muscles was analyzed through LC-MS/MS.

(A) Pathway Analysis using MetaboAnalyst 4.0 Software comparing significantly altered pathways from saline to GW. Pathways are ranked by their significance and filtered based on a Pathway Impact Score >0.1. Metabolomic data were range-scaled and mean-centered.

(B-C) Heatmap visualizing mean concentration corresponding to (B) metabolites involved in Glycolysis and TCA cycle or (C) amino acids and amino acid derivatives in GW treated mice relative to saline controls. Red and green indicate an increase or decrease in metabolite levels, respectively.

*Data information:* Individual data points represent values from individual mice, with a total of six mice per cohort (n = 6).



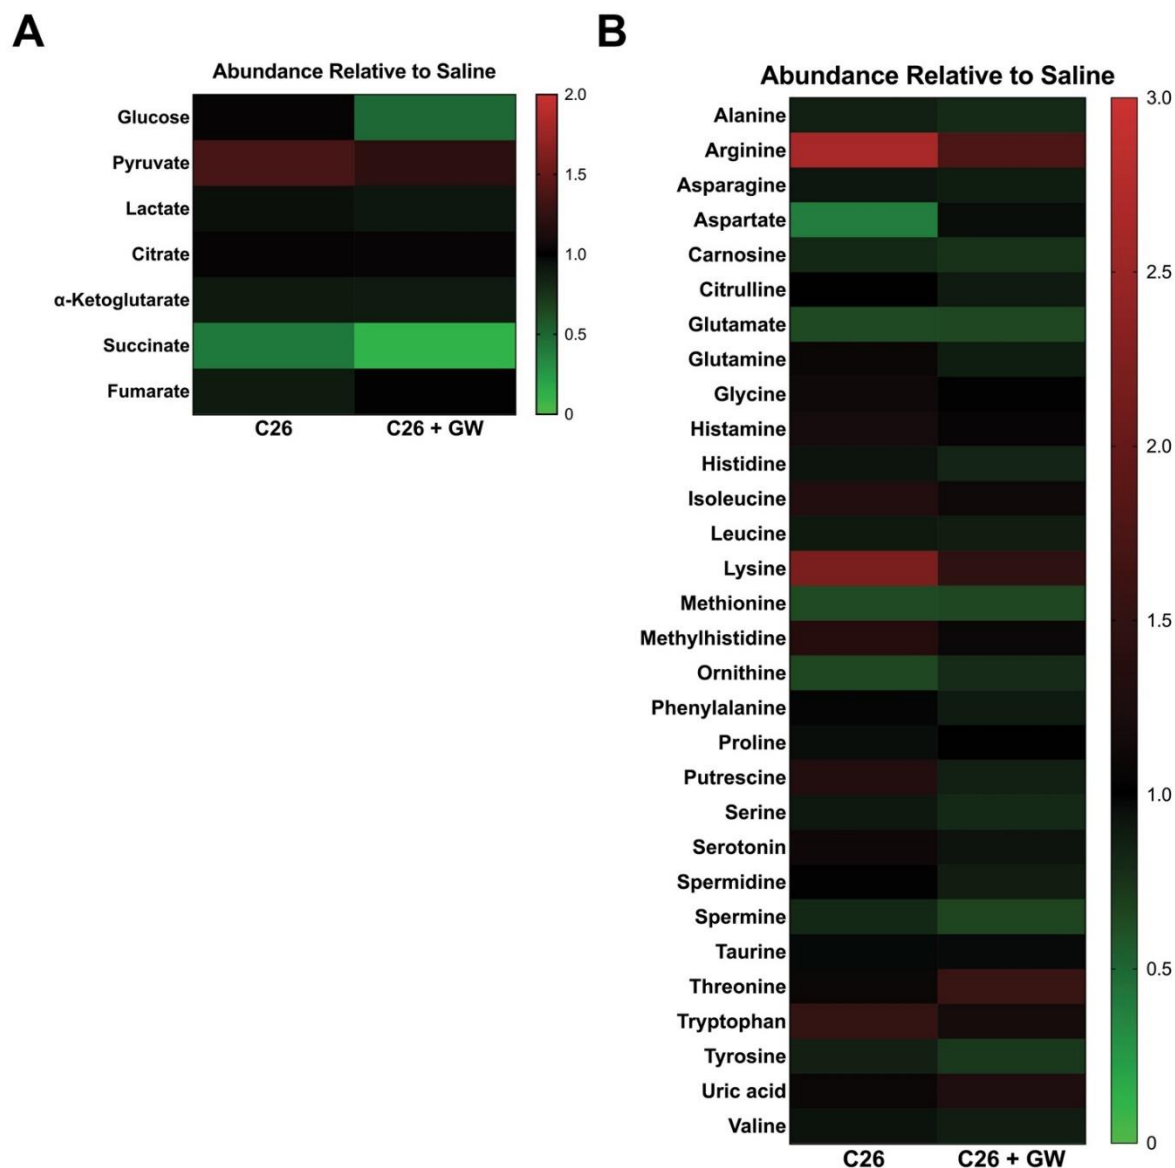

**Appendix Figure S6: Pharmacological inhibition of iNOS prevents C26-driven deregulation of amino acid metabolism.**

Male BALB/C mice were injected subcutaneously with C26 cells ( $1.25 \times 10^6$  cells) or an equivalent volume of saline. After 5 days and everyday thereafter, the mice injected with C26 cells were injected with either saline or GW  $5 \text{ mg kg}^{-1}$ . After 16 days, mice were euthanized and the metabolome of tibialis anterior muscles was analyzed through LC-MS/MS.

(A-B) Heatmap visualizing mean concentration corresponding to (A) metabolites involved in Glycolysis and TCA cycle or (B) amino acids and amino acid derivatives relative to saline controls. Red and green indicate an increase or decrease in metabolite levels, respectively.

*Data information:* Individual data points represent values from individual mice, with a total of six mice per cohort ( $n = 6$ ).

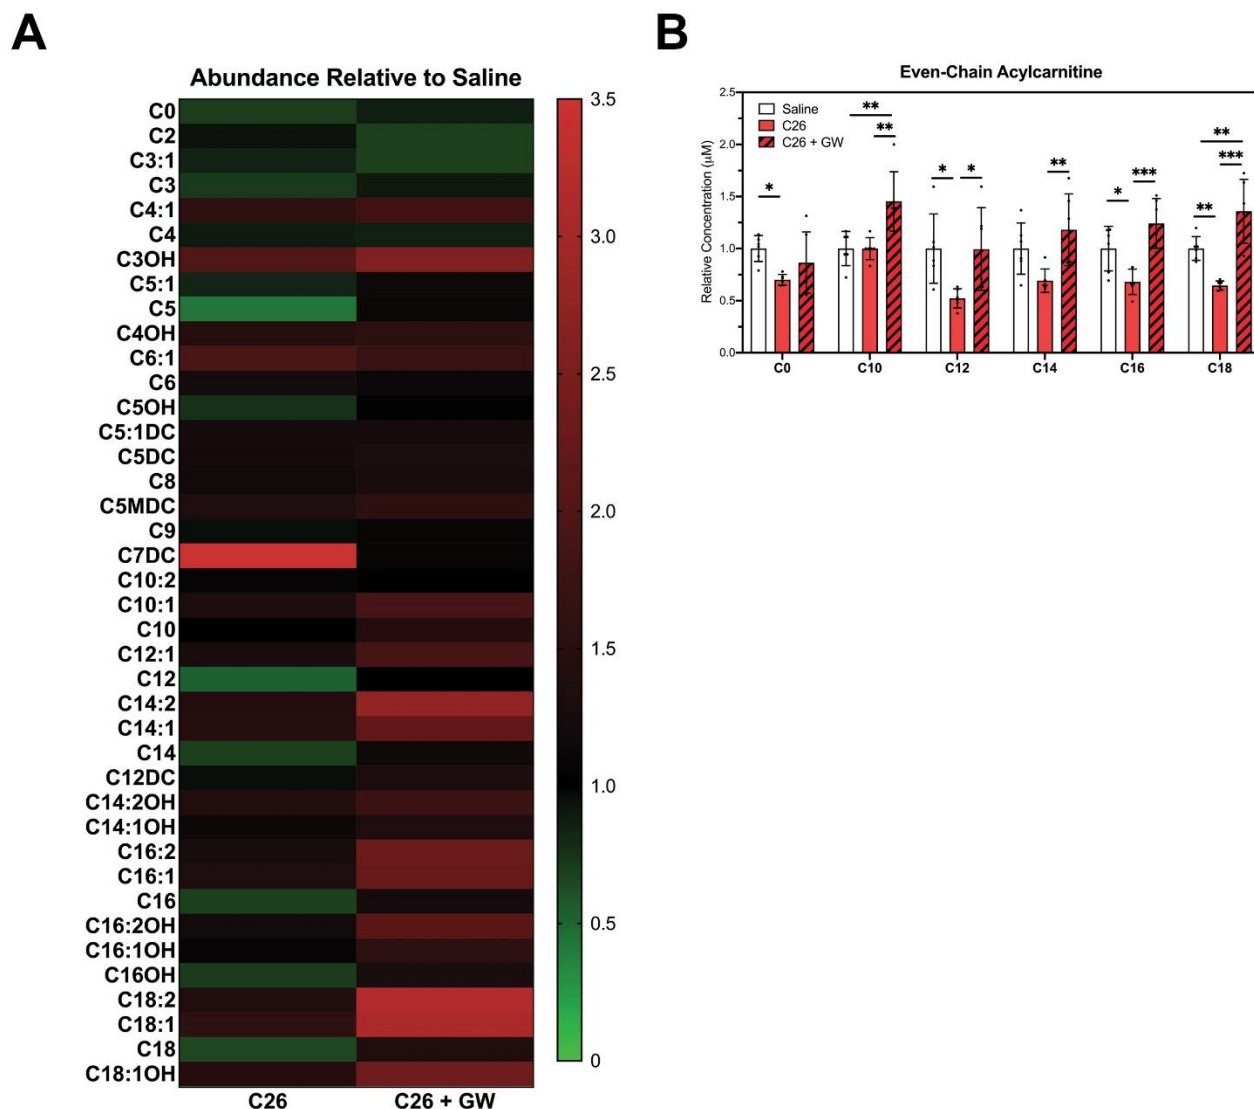

**Appendix Figure S7: Pharmacological inhibition of iNOS prevents C26-driven deregulation of acylcarnitine metabolism.**

Male BALB/C mice were injected subcutaneously with C26 cells ( $1.25 \times 10^6$  cells) or an equivalent volume of saline. After 5 days and everyday thereafter, the mice injected with C26 cells were injected with either saline or GW ( $5 \text{ mg kg}^{-1}$ ). After 16 days, mice were euthanized and the metabolome of tibialis anterior muscles was analyzed through LC-MS/MS.

- (A) Heatmap visualizing mean concentration of acylcarnitines relative to saline controls. Red and green indicate an increase or decrease in metabolite levels, respectively.
- (B) Relative concentrations of even-chain acylcarnitines.

*Data information:* Individual data points represent values from individual mice, with a total of six mice per cohort ( $n = 6$ ). Error bars represent the standard deviation (SD) of the mean. p-values were calculated with an ANOVA followed by Fisher's LSD test (\* $P < 0.05$ ; \*\* $P < 0.01$ ; \*\*\* $P < 0.001$ ).

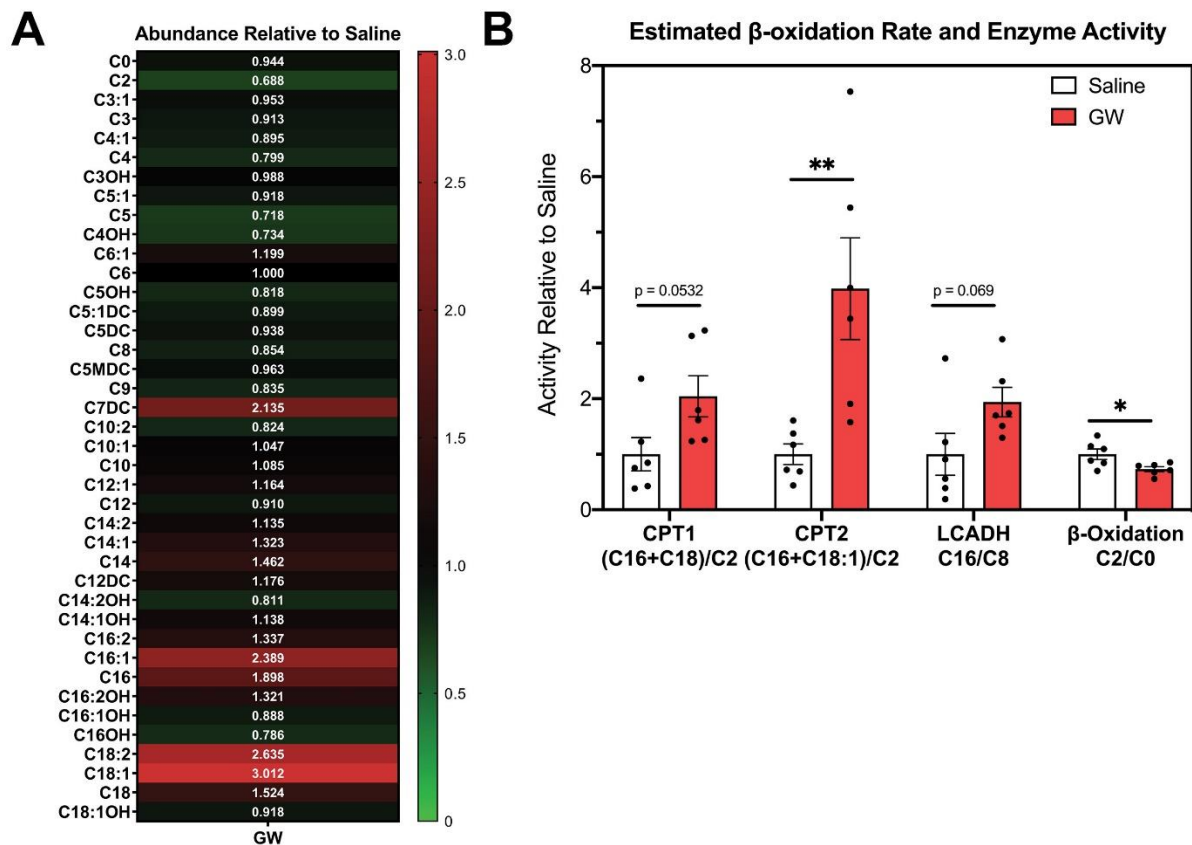

### Appendix Figure S8: GW alters acylcarnitine metabolism and $\beta$ -oxidation in mice.

Male BALB/C mice were injected subcutaneously with saline. After 5 days and everyday thereafter, the mice were injected with either saline or GW 5mg kg<sup>-1</sup>. After 16 days, mice were euthanized and the metabolome of tibialis anterior muscles was analyzed through LC-MS/MS.

- (A) Heatmap visualizing mean concentration of acylcarnitines relative to saline controls. Red and green indicate an increase or decrease in metabolite levels, respectively.
- (B) Relative estimated activity of CPT1, CPT2, LCADH, and  $\beta$ -oxidation.

*Data information:* Individual data points represent values from individual mice, with a total of six mice per cohort (n = 6) Error bars represent the standard deviation (SD) of the mean. p-values were calculated with an ANOVA followed by Fisher's LSD test (\*P < 0.05; \*\*P < 0.01; \*\*\*P < 0.001).

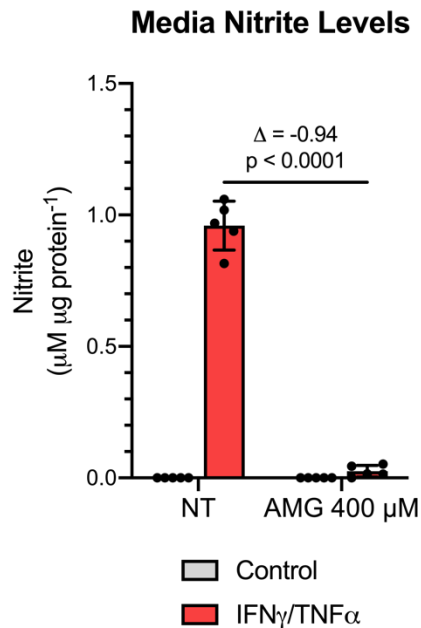

**Appendix Figure S9: AMG prevents nitric oxide production in cytokine-treated myotubes.**

C2C12 myotubes were treated with or without IFN<sub>γ</sub> (100U/mL) and TNF<sub>α</sub> (20ng/mL) and the indicated dose of aminoguanidine (AMG). Media nitrite levels were then measured 24h after treatment.

*Data Information:* Individual data points represent five independent experimental replicates (n=5). Error bars represent the standard deviation (SD) of the mean. For statistical comparisons, Δ indicates the difference of mean values and p-values were calculated with an ANOVA followed by Fisher's LSD test.

**A**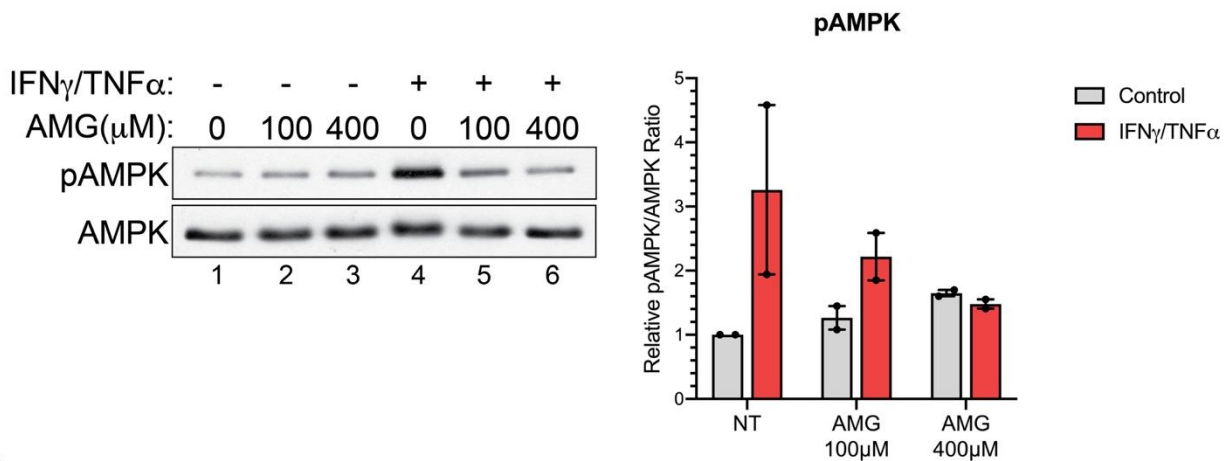**B**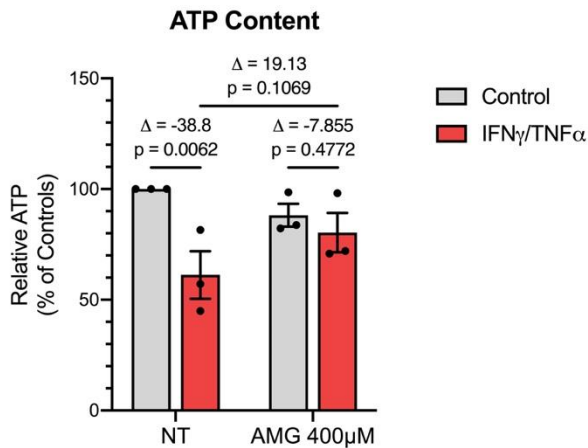

**Appendix Figure S10: AMG recovers cellular ATP levels and reduces AMPK activation in cytokine-treated myotubes.**

C2C12 myotubes were treated with or without IFN $\gamma$  (100U/mL) and TNF $\alpha$  (20ng/mL) and the indicated doses aminoguanidine (AMG) for 24h.

- (A) (*left*) Western blot analysis for pThr172-AMPK (pAMPK) and total AMPK (AMPK). (*right*) Quantification of the pAMPK to AMPK ratio relative to the untreated control (n=2).
- (B) Cellular ATP content in myotubes treated with or without IFN $\gamma$  and TNF $\alpha$  in the presence or absence of AMG. ATP content is shown as a percentage of the corresponding untreated control (n=3).

*Data information:* Individual data points are from two to three independent experimental replicates (n = 2-3). Error bars represent the standard deviation (SD) of the mean. For statistical comparisons,  $\Delta$  indicates the difference of mean values and p-values were calculated with an ANOVA followed by Fisher's LSD test.

**A**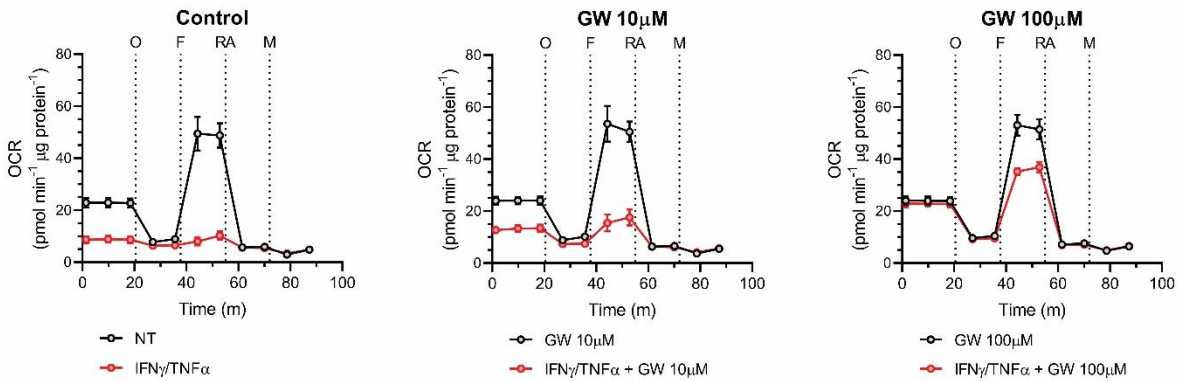**B**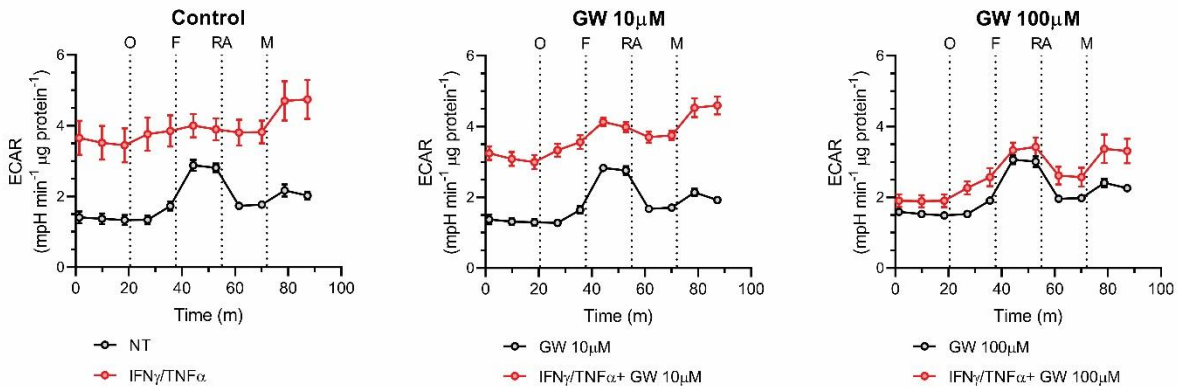

### Appendix Figure S11: GW274150 reverses IFN $\gamma$ /TNF $\alpha$ -induced suppression of OCR and elevation of ECAR.

C2C12 myotubes were treated with or without IFN $\gamma$  (100U/mL) and TNF $\alpha$  (20ng/mL) and the indicated doses of GW274150 (GW). Extracellular flux was measured after 24h with a Seahorse XF Analyzer. Sequential injections of oligomycin (O, 1 $\mu\text{M}$ ), FCCP (F, 1.5 $\mu\text{M}$ ), Rotenone + Antimycin A (RA, 1 $\mu\text{M}$ ), and monensin (M, 20 $\mu\text{M}$ ) were performed to assess the bioenergetic profile.

(A) Oxygen consumption rate (OCR).

(B) Extracellular acidification rate (ECAR).

*Data Information:* Results are a representative example of three independent experiments (n = 3). Error bars represent the standard deviation of technical triplicates.

**A**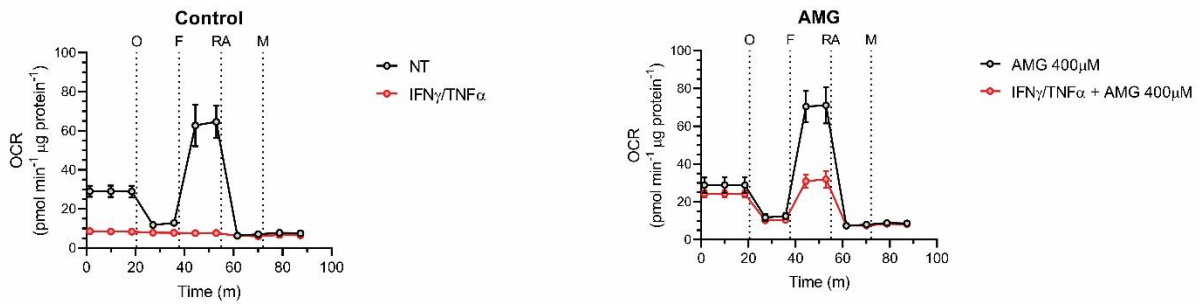**B**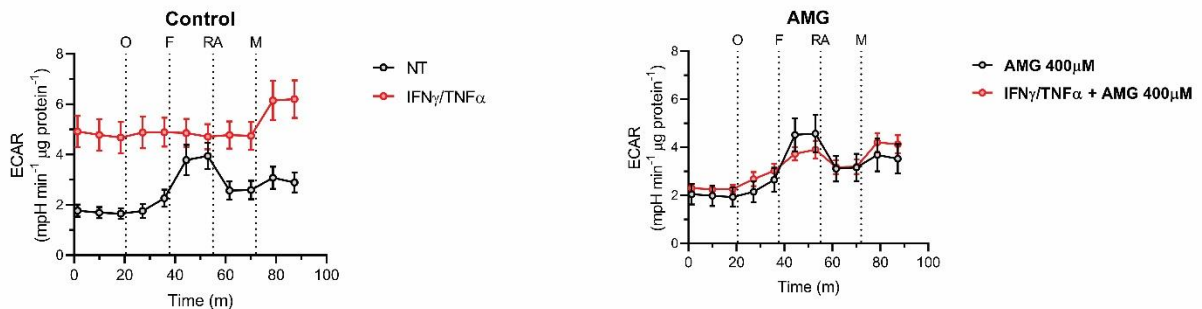

### Appendix Figure S12: Aminoguanidine reverses IFN $\gamma$ /TNF $\alpha$ -induced suppression of OCR and elevation of ECAR.

C2C12 myotubes were treated with or without IFN $\gamma$  (100U/mL) and TNF $\alpha$  (20ng/mL) and aminoguanidine (AMG; 400 $\mu$ M). Extracellular flux was measured after 24h with a Seahorse XF analyzer. Sequential injections of oligomycin (O, 1 $\mu$ M), FCCP (F, 1.5 $\mu$ M), Rotenone + Antimycin A (RA, 1 $\mu$ M), and monensin (M, 20 $\mu$ M) were performed to assess the bioenergetic profile.

(A) Oxygen consumption rate (OCR).

(B) Extracellular acidification rate (ECAR).

*Data Information:* Results are a representative example of three independent experiments (n = 3). Error bars represent the standard deviation of technical replicates.

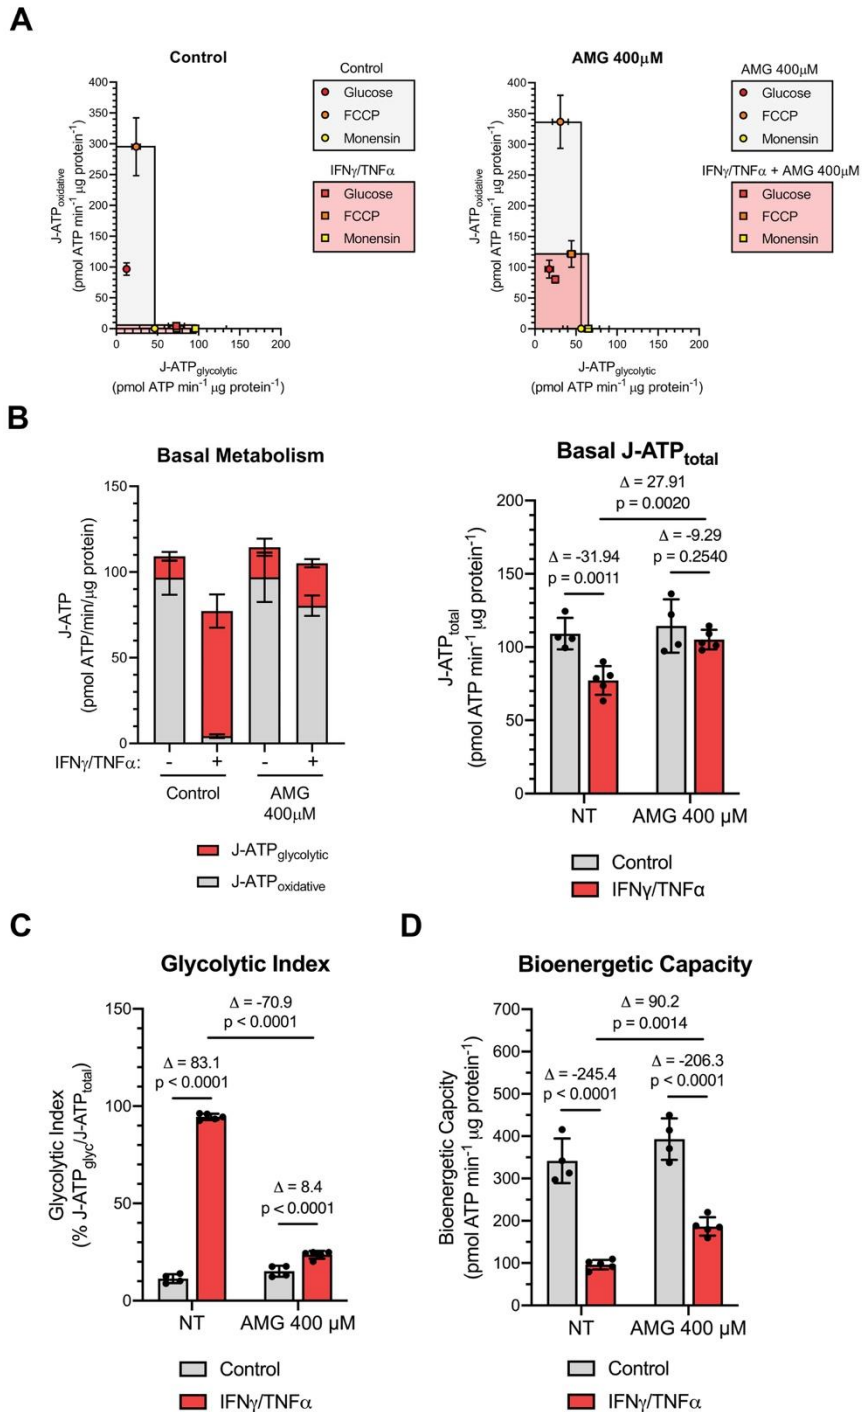

**Appendix Figure S13: Aminoguanidine prevents a cytokine-induced shift to aerobic glycolysis in C2C12.**

C2C12 myotubes were treated with or without IFN $\gamma$  (100U/mL) and TNF $\alpha$  (20ng/mL) and aminoguanidine (AMG; 400 $\mu$ M). ATP production rates (J-ATP) from oxidative phosphorylation (oxidative) and glycolysis (glycolytic) were determined from measurements of extracellular flux 24h after treatment.



(A) Bioenergetic profiles. Highlighted squares are defined by the theoretical maximal  $J\text{-ATP}_{\text{oxidative}}$  and  $J\text{-ATP}_{\text{glycolytic}}$  rates.

(B) (*left*) Basal  $J\text{-ATP}_{\text{glycolytic}}$  and  $J\text{-ATP}_{\text{oxidative}}$  rates. (*right*) Total basal  $J\text{-ATP}$  rate.

(C) Glycolytic index of basal metabolism.

(D) Total bioenergetic capacity.

*Data Information:* Individual data points represent technical replicates. The data is representative of three independent experiments ( $n = 3$ ). Error bars represent the standard deviation (SD) of the mean of technical replicates. For statistical comparisons,  $\Delta$  indicates the difference of mean values of technical replicates and p-values were calculated with an ANOVA followed by Fisher's LSD test.

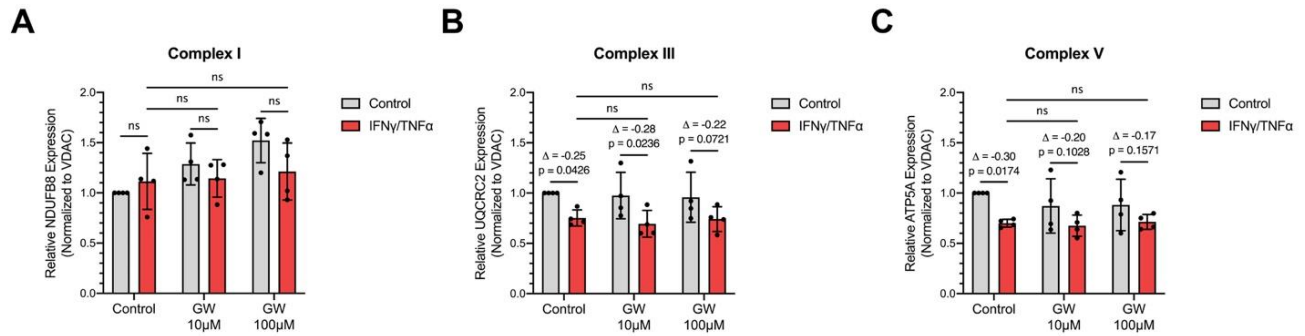

**Appendix Figure S14: Effect of cytokine-induced muscle wasting on complex integrity.**

C2C12 myotubes were treated with or without IFN $\gamma$  (100U/mL) and TNF $\alpha$  (20ng/mL) and the indicated doses of GW274150 (GW). Protein content was extracted 24h after treatment.

(A-C) Quantification of complex subunits normalized to VDAC (Outer Mitochondrial Membrane; OMM) and relative to untreated control. (A) NDUFB8 (Complex I; CI) (B) UQCRC2 (Complex III; CIII) (C) ATP5A (Complex V; CV).

*Data information:* Individual data points are from four independent experimental replicates (n = 4). Error bars represent the standard deviation (SD) of the mean. For statistical comparisons,  $\Delta$  indicates the difference of mean values and p-values were calculated with an ANOVA followed by Fisher's LSD test. Non statistically significant comparisons (P > 0.05) are indicated as non-significant (ns).

## Appendix Tables

**Appendix Table S1. Significance p-values for Figure 1.**

| Figure | Panel    | Comparison              | p-value | Significant? |
|--------|----------|-------------------------|---------|--------------|
| 1      | B, right | WT Saline vs WT LPS     | 0.069   | No           |
| 1      | B, right | KO Saline vs KO LPS     | 0.6325  | No           |
| 1      | D        | WT Saline vs. WT LPS    | 0.002   | Yes          |
| 1      | D        | WT Saline vs. KO Saline | 0.4889  | No           |
| 1      | D        | WT Saline vs. KO LPS    | 0.3809  | No           |
| 1      | D        | WT LPS vs. KO Saline    | 0.0135  | Yes          |
| 1      | D        | WT LPS vs. KO LPS       | 0.0215  | Yes          |
| 1      | D        | KO Saline vs. KO LPS    | 0.8527  | No           |
| 1      | E        | WT Saline vs. WT LPS    | 0.0093  | Yes          |
| 1      | E        | WT Saline vs. KO Saline | 0.0637  | No           |
| 1      | E        | WT Saline vs. KO LPS    | 0.3383  | No           |
| 1      | E        | WT LPS vs. KO Saline    | 0.4261  | No           |
| 1      | E        | WT LPS vs. KO LPS       | 0.0896  | No           |
| 1      | E        | KO Saline vs. KO LPS    | 0.3585  | No           |
| 1      | F        | WT Saline vs. WT LPS    | 0.0173  | Yes          |
| 1      | F        | WT Saline vs. KO Saline | 0.1215  | No           |
| 1      | F        | WT Saline vs. KO LPS    | 0.0075  | Yes          |
| 1      | F        | WT LPS vs. KO Saline    | 0.3825  | No           |
| 1      | F        | WT LPS vs. KO LPS       | 0.7483  | No           |
| 1      | F        | KO Saline vs. KO LPS    | 0.2342  | No           |
| 1      | G, right | WT Saline vs WT LPS     | <0.0001 | Yes          |
| 1      | G, right | KO Saline vs KO LPS     | 0.3161  | No           |
| 1      | H        | WT Saline vs. WT LPS    | <0.0001 | Yes          |
| 1      | H        | WT Saline vs. KO Saline | 0.912   | No           |
| 1      | H        | WT Saline vs. KO LPS    | 0.6808  | No           |
| 1      | H        | WT LPS vs. KO Saline    | 0.0001  | Yes          |
| 1      | H        | WT LPS vs. KO LPS       | 0.0003  | Yes          |
| 1      | H        | KO Saline vs. KO LPS    | 0.6247  | No           |

Abbreviations: WT, Wild-type. KO, iNOS Knockout. LPS, Lipopolysaccharide.

**Appendix Table S2. Significance p-values for Figure 2.**

| Figure | Panel                                                  | Comparison          | p-value  | Significant? |
|--------|--------------------------------------------------------|---------------------|----------|--------------|
| 2      | B, Arginine biosynthesis                               | WT Saline vs WT LPS | 0.000211 | Yes          |
| 2      | B, D-Glutamine and D-glutamate metabolism              | WT Saline vs WT LPS | 0.000717 | Yes          |
| 2      | B, Alanine, aspartate and glutamate metabolism         | WT Saline vs WT LPS | 0.001559 | Yes          |
| 2      | B, Citrate cycle (TCA cycle)                           | WT Saline vs WT LPS | 0.001625 | Yes          |
| 2      | B, Aminoacyl-tRNA biosynthesis                         | WT Saline vs WT LPS | 0.002228 | Yes          |
| 2      | B, Phenylalanine, tyrosine and tryptophan biosynthesis | WT Saline vs WT LPS | 0.003177 | Yes          |
| 2      | B, Glycerophospholipid metabolism                      | WT Saline vs WT LPS | 0.004314 | Yes          |
| 2      | B, Phenylalanine metabolism                            | WT Saline vs WT LPS | 0.004961 | Yes          |
| 2      | B, Arginine and proline metabolism                     | WT Saline vs WT LPS | 0.00933  | Yes          |
| 2      | B, Glyoxylate and dicarboxylate metabolism             | WT Saline vs WT LPS | 0.012332 | Yes          |
| 2      | B, Glycolysis / Gluconeogenesis                        | WT Saline vs WT LPS | 0.030671 | Yes          |
| 2      | B, Pyruvate metabolism                                 | WT Saline vs WT LPS | 0.057666 | No           |
| 2      | B, Glycine, serine and threonine metabolism            | WT Saline vs WT LPS | 0.073631 | No           |
| 2      | B, Tyrosine metabolism                                 | WT Saline vs WT LPS | 0.083293 | No           |
| 2      | B, Starch and sucrose metabolism                       | WT Saline vs WT LPS | 0.090833 | No           |
| 2      | B, Glutathione metabolism                              | WT Saline vs WT LPS | 0.10425  | No           |
| 2      | B, Histidine metabolism                                | WT Saline vs WT LPS | 0.12032  | No           |
| 2      | B, Tryptophan metabolism                               | WT Saline vs WT LPS | 0.16151  | No           |
| 2      | B, Cysteine and methionine metabolism                  | WT Saline vs WT LPS | 0.40348  | No           |
| 2      | B, Taurine and hypotaurine metabolism                  | WT Saline vs WT LPS | 0.47049  | No           |
| 2      | B, beta-Alanine metabolism                             | WT Saline vs WT LPS | 0.52032  | No           |
| 2      | B, Arginine biosynthesis                               | KO Saline vs KO LPS | 0.067745 | No           |
| 2      | B, D-Glutamine and D-glutamate metabolism              | KO Saline vs KO LPS | 0.41731  | No           |
| 2      | B, Alanine, aspartate and glutamate metabolism         | KO Saline vs KO LPS | 0.29741  | No           |
| 2      | B, Citrate cycle (TCA cycle)                           | KO Saline vs KO LPS | 0.41669  | No           |
| 2      | B, Aminoacyl-tRNA biosynthesis                         | KO Saline vs KO LPS | 0.064105 | No           |
| 2      | B, Phenylalanine, tyrosine and tryptophan biosynthesis | KO Saline vs KO LPS | 0.026998 | Yes          |
| 2      | B, Glycerophospholipid metabolism                      | KO Saline vs KO LPS | 0.43848  | No           |
| 2      | B, Phenylalanine metabolism                            | KO Saline vs KO LPS | 0.027012 | Yes          |
| 2      | B, Arginine and proline metabolism                     | KO Saline vs KO LPS | 0.015403 | Yes          |
| 2      | B, Glyoxylate and dicarboxylate metabolism             | KO Saline vs KO LPS | 0.26029  | No           |
| 2      | B, Glycolysis / Gluconeogenesis                        | KO Saline vs KO LPS | 0.45186  | No           |
| 2      | B, Pyruvate metabolism                                 | KO Saline vs KO LPS | 0.47224  | No           |
| 2      | B, Glycine, serine and threonine metabolism            | KO Saline vs KO LPS | 0.31681  | No           |
| 2      | B, Tyrosine metabolism                                 | KO Saline vs KO LPS | 0.09504  | No           |
| 2      | B, Starch and sucrose metabolism                       | KO Saline vs KO LPS | 0.24164  | No           |
| 2      | B, Glutathione metabolism                              | KO Saline vs KO LPS | 0.076092 | No           |
| 2      | B, Histidine metabolism                                | KO Saline vs KO LPS | 0.4486   | No           |
| 2      | B, Tryptophan metabolism                               | KO Saline vs KO LPS | 0.016627 | Yes          |
| 2      | B, Cysteine and methionine metabolism                  | KO Saline vs KO LPS | 0.75813  | No           |
| 2      | B, Taurine and hypotaurine metabolism                  | KO Saline vs KO LPS | 0.74198  | No           |
| 2      | B, beta-Alanine metabolism                             | KO Saline vs KO LPS | 0.41639  | No           |
| 2      | C, right                                               | WT Saline vs WT LPS | 0.003    | Yes          |
| 2      | C, right                                               | KO Saline vs KO LPS | <0.0001  | Yes          |
| 2      | E, Glucose                                             | WT Saline vs WT LPS | 0.0908   | No           |
| 2      | E, Glucose                                             | KO Saline vs KO LPS | 0.2416   | No           |
| 2      | E, Pyruvate                                            | WT Saline vs WT LPS | 0.095    | No           |
| 2      | E, Pyruvate                                            | KO Saline vs KO LPS | 0.5284   | No           |
| 2      | E, Citrate                                             | WT Saline vs WT LPS | 0.0226   | Yes          |
| 2      | E, Citrate                                             | KO Saline vs KO LPS | 0.2141   | No           |
| 2      | E, $\alpha$ -ketoglutarate                             | WT Saline vs WT LPS | 0.0013   | Yes          |
| 2      | E, $\alpha$ -ketoglutarate                             | KO Saline vs KO LPS | 0.8498   | No           |
| 2      | E, Succinate                                           | WT Saline vs WT LPS | 0.1263   | No           |

|   |                       |                     |        |     |
|---|-----------------------|---------------------|--------|-----|
| 2 | E, Succinate          | KO Saline vs KO LPS | 0.1646 | No  |
| 2 | F, Arginine           | WT Saline vs WT LPS | 0.0151 | Yes |
| 2 | F, Arginine           | KO Saline vs KO LPS | 0.6179 | No  |
| 2 | H, CPT1               | WT Saline vs WT LPS | 0.0135 | Yes |
| 2 | H, CPT1               | KO Saline vs KO LPS | 0.2961 | No  |
| 2 | H, CPT2               | WT Saline vs WT LPS | 0.1369 | No  |
| 2 | H, CPT2               | KO Saline vs KO LPS | 0.923  | No  |
| 2 | H, LCADH              | WT Saline vs WT LPS | 0.5731 | No  |
| 2 | H, LCADH              | KO Saline vs KO LPS | 0.1448 | No  |
| 2 | H, $\beta$ -Oxidation | WT Saline vs WT LPS | 0.5692 | No  |
| 2 | H, $\beta$ -Oxidation | KO Saline vs KO LPS | 0.4015 | No  |

Abbreviations: WT, Wild-type. KO, iNOS Knockout. LPS, Lipopolysaccharide.

**Appendix Table S3. Significance p-values for Figure 3.**

| Figure | Panel    | Comparison          | p-value | Significant? |
|--------|----------|---------------------|---------|--------------|
| 3      | A        | C26 vs C26 + GW     | 0.4498  | No           |
| 3      | B, right | Saline vs. C26      | <0.0001 | Yes          |
| 3      | B, right | Saline vs. GW       | 0.0748  | No           |
| 3      | B, right | Saline vs. GW C26   | 0.0054  | Yes          |
| 3      | B, right | C26 vs. GW          | <0.0001 | Yes          |
| 3      | B, right | C26 vs. GW C26      | 0.001   | Yes          |
| 3      | B, right | GW vs. GW C26       | 0.0001  | Yes          |
| 3      | C        | Saline vs. C26      | <0.0001 | Yes          |
| 3      | C        | Saline vs. GW       | 0.6877  | No           |
| 3      | C        | Saline vs. C26 + GW | <0.0001 | Yes          |
| 3      | C        | C26 vs. GW          | <0.0001 | Yes          |
| 3      | C        | C26 vs. C26 + GW    | 0.0678  | No           |
| 3      | C        | GW vs. C26 + GW     | <0.0001 | Yes          |
| 3      | D        | Saline vs. C26      | <0.0001 | Yes          |
| 3      | D        | Saline vs. GW       | 0.5405  | No           |
| 3      | D        | Saline vs. C26 + GW | 0.0001  | Yes          |
| 3      | D        | C26 vs. GW          | <0.0001 | Yes          |
| 3      | D        | C26 vs. C26 + GW    | 0.0008  | Yes          |
| 3      | D        | GW vs. C26 + GW     | 0.0006  | Yes          |
| 3      | E        | Saline vs. C26      | <0.0001 | Yes          |
| 3      | E        | Saline vs. GW       | 0.0489  | Yes          |
| 3      | E        | Saline vs. C26 + GW | <0.0001 | Yes          |
| 3      | E        | C26 vs. GW          | <0.0001 | Yes          |
| 3      | E        | C26 vs. C26 + GW    | 0.0004  | Yes          |
| 3      | E        | GW vs. C26 + GW     | <0.0001 | Yes          |
| 3      | F        | Saline vs. C26      | <0.0001 | Yes          |
| 3      | F        | Saline vs. GW       | 0.3933  | No           |
| 3      | F        | Saline vs. C26 + GW | <0.0001 | Yes          |
| 3      | F        | C26 vs. GW          | <0.0001 | Yes          |
| 3      | F        | C26 vs. C26 + GW    | 0.0051  | Yes          |
| 3      | F        | GW vs. C26 + GW     | <0.0001 | Yes          |
| 3      | G        | Saline vs. C26      | <0.0001 | Yes          |
| 3      | G        | Saline vs. GW       | 0.5787  | No           |
| 3      | G        | Saline vs. C26 + GW | 0.0093  | Yes          |
| 3      | G        | C26 vs. GW          | 0.0003  | Yes          |
| 3      | G        | C26 vs. C26 + GW    | 0.0489  | Yes          |
| 3      | G        | GW vs. C26 + GW     | 0.0314  | Yes          |
| 3      | H, right | Saline vs C26       | <0.0001 | Yes          |
| 3      | H, right | Saline vs GW        | 0.1197  | No           |
| 3      | H, right | Saline vs C26 + GW  | <0.0001 | Yes          |
| 3      | H, right | GW vs C26 + GW      | <0.0001 | Yes          |

|   |          |                     |         |     |
|---|----------|---------------------|---------|-----|
| 3 | H, right | C26 vs C26 + GW     | <0.0001 | Yes |
| 3 | I        | Saline vs. C26      | 0.0009  | Yes |
| 3 | I        | Saline vs. GW       | 0.1805  | No  |
| 3 | I        | Saline vs. C26 + GW | 0.0306  | Yes |
| 3 | I        | C26 vs. GW          | 0.021   | Yes |
| 3 | I        | C26 vs. C26 + GW    | 0.1333  | No  |
| 3 | I        | GW vs. C26 + GW     | 0.3588  | No  |

Abbreviations: GW, GW274150.

**Appendix Table S4. Significance p-values for Figure 4.**

| Figure | Panel                                                  | Comparison          | p-value    | Significant? |
|--------|--------------------------------------------------------|---------------------|------------|--------------|
| 4      | B, Arginine and proline metabolism                     | Saline vs C26       | 0.0000763  | Yes          |
| 4      | B, Cysteine and methionine metabolism                  | Saline vs C26       | 0.00017348 | Yes          |
| 4      | B, Histidine metabolism                                | Saline vs C26       | 0.0018642  | Yes          |
| 4      | B, Aminoacyl-tRNA biosynthesis                         | Saline vs C26       | 0.002167   | Yes          |
| 4      | B, Arginine biosynthesis                               | Saline vs C26       | 0.0029727  | Yes          |
| 4      | B, Pyruvate metabolism                                 | Saline vs C26       | 0.0051888  | Yes          |
| 4      | B, Glycine, serine and threonine metabolism            | Saline vs C26       | 0.006199   | Yes          |
| 4      | B, Glutathione metabolism                              | Saline vs C26       | 0.006411   | Yes          |
| 4      | B, Glycolysis / Gluconeogenesis                        | Saline vs C26       | 0.007385   | Yes          |
| 4      | B, Tryptophan metabolism                               | Saline vs C26       | 0.010722   | Yes          |
| 4      | B, beta-Alanine metabolism                             | Saline vs C26       | 0.025259   | Yes          |
| 4      | B, Glycerophospholipid metabolism                      | Saline vs C26       | 0.027221   | Yes          |
| 4      | B, Alanine, aspartate and glutamate metabolism         | Saline vs C26       | 0.053877   | No           |
| 4      | B, Tyrosine metabolism                                 | Saline vs C26       | 0.063717   | No           |
| 4      | B, Glyoxylate and dicarboxylate metabolism             | Saline vs C26       | 0.088995   | No           |
| 4      | B, Citrate cycle (TCA cycle)                           | Saline vs C26       | 0.092513   | No           |
| 4      | B, D-Glutamine and D-glutamate metabolism              | Saline vs C26       | 0.1418     | No           |
| 4      | B, Taurine and hypotaurine metabolism                  | Saline vs C26       | 0.25613    | No           |
| 4      | B, Phenylalanine, tyrosine and tryptophan biosynthesis | Saline vs C26       | 0.44076    | No           |
| 4      | B, Phenylalanine metabolism                            | Saline vs C26       | 0.51796    | No           |
| 4      | B, Starch and sucrose metabolism                       | Saline vs C26       | 0.86946    | No           |
| 4      | B, Arginine and proline metabolism                     | C26 vs C26 + GW     | 0.022394   | Yes          |
| 4      | B, Cysteine and methionine metabolism                  | C26 vs C26 + GW     | 0.07598    | No           |
| 4      | B, Histidine metabolism                                | C26 vs C26 + GW     | 0.17476    | No           |
| 4      | B, Aminoacyl-tRNA biosynthesis                         | C26 vs C26 + GW     | 0.052388   | No           |
| 4      | B, Arginine biosynthesis                               | C26 vs C26 + GW     | 0.031137   | Yes          |
| 4      | B, Pyruvate metabolism                                 | C26 vs C26 + GW     | 0.013299   | Yes          |
| 4      | B, Glycine, serine and threonine metabolism            | C26 vs C26 + GW     | 0.1443     | No           |
| 4      | B, Glutathione metabolism                              | C26 vs C26 + GW     | 0.048382   | Yes          |
| 4      | B, Glycolysis / Gluconeogenesis                        | C26 vs C26 + GW     | 0.032564   | Yes          |
| 4      | B, Tryptophan metabolism                               | C26 vs C26 + GW     | 0.080335   | No           |
| 4      | B, beta-Alanine metabolism                             | C26 vs C26 + GW     | 0.14921    | No           |
| 4      | B, Glycerophospholipid metabolism                      | C26 vs C26 + GW     | 0.122      | No           |
| 4      | B, Alanine, aspartate and glutamate metabolism         | C26 vs C26 + GW     | 0.017309   | Yes          |
| 4      | B, Tyrosine metabolism                                 | C26 vs C26 + GW     | 0.034933   | Yes          |
| 4      | B, Glyoxylate and dicarboxylate metabolism             | C26 vs C26 + GW     | 0.11468    | No           |
| 4      | B, Citrate cycle (TCA cycle)                           | C26 vs C26 + GW     | 0.0051395  | Yes          |
| 4      | B, D-Glutamine and D-glutamate metabolism              | C26 vs C26 + GW     | 0.29282    | No           |
| 4      | B, Taurine and hypotaurine metabolism                  | C26 vs C26 + GW     | 0.46719    | No           |
| 4      | B, Phenylalanine, tyrosine and tryptophan biosynthesis | C26 vs C26 + GW     | 0.099194   | No           |
| 4      | B, Phenylalanine metabolism                            | C26 vs C26 + GW     | 0.13622    | No           |
| 4      | B, Starch and sucrose metabolism                       | C26 vs C26 + GW     | 0.0000345  | Yes          |
| 4      | C, right                                               | Saline vs. C26      | 0.0111     | Yes          |
| 4      | C, right                                               | Saline vs. GW       | 0.8661     | No           |
| 4      | C, right                                               | Saline vs. GW C26   | 0.228      | No           |
| 4      | C, right                                               | C26 vs. GW          | 0.0086     | Yes          |
| 4      | C, right                                               | C26 vs. GW C26      | 0.0831     | No           |
| 4      | C, right                                               | GW vs. GW C26       | 0.1772     | No           |
| 4      | D, Glucose                                             | Saline vs. C26      | 0.8658     | No           |
| 4      | D, Glucose                                             | Saline vs. C26 + GW | <0.0001    | Yes          |
| 4      | D, Glucose                                             | C26 vs. C26 + GW    | <0.0001    | Yes          |
| 4      | D, Pyruvate                                            | Saline vs. C26      | 0.0266     | Yes          |
| 4      | D, Pyruvate                                            | Saline vs. C26 + GW | 0.1733     | No           |



|   |                       |                     |         |     |
|---|-----------------------|---------------------|---------|-----|
| 4 | D, Pyruvate           | C26 vs. C26 + GW    | 0.32    | No  |
| 4 | E, Arginine           | Saline vs. C26      | 0.0002  | Yes |
| 4 | E, Arginine           | Saline vs. C26 + GW | 0.0432  | Yes |
| 4 | E, Arginine           | C26 vs. C26 + GW    | 0.0211  | Yes |
| 4 | E, Lysine             | Saline vs. C26      | 0.0019  | Yes |
| 4 | E, Lysine             | Saline vs. C26 + GW | 0.1724  | No  |
| 4 | E, Lysine             | C26 vs. C26 + GW    | 0.0341  | Yes |
| 4 | E, Methylhistidine    | Saline vs. C26      | 0.0002  | Yes |
| 4 | E, Methylhistidine    | Saline vs. C26 + GW | 0.1732  | No  |
| 4 | E, Methylhistidine    | C26 vs. C26 + GW    | 0.0033  | Yes |
| 4 | E, Tryptophan         | Saline vs. C26      | 0.0002  | Yes |
| 4 | E, Tryptophan         | Saline vs. C26 + GW | 0.1198  | No  |
| 4 | E, Tryptophan         | C26 vs. C26 + GW    | 0.0052  | Yes |
| 4 | E, Aspartate          | Saline vs. C26      | 0.0688  | No  |
| 4 | E, Aspartate          | Saline vs. C26 + GW | 0.8977  | No  |
| 4 | E, Aspartate          | C26 vs. C26 + GW    | 0.0873  | No  |
| 4 | F, C3                 | Saline vs. C26      | 0.0051  | Yes |
| 4 | F, C3                 | Saline vs. C26 + GW | 0.265   | No  |
| 4 | F, C3                 | C26 vs. C26 + GW    | 0.0508  | No  |
| 4 | F, C5                 | Saline vs. C26      | 0.1307  | No  |
| 4 | F, C5                 | Saline vs. C26 + GW | 0.7402  | No  |
| 4 | F, C5                 | C26 vs. C26 + GW    | 0.0718  | No  |
| 4 | G, CPT1               | Saline vs. C26      | 0.8755  | No  |
| 4 | G, CPT1               | Saline vs. C26 + GW | 0.0024  | Yes |
| 4 | G, CPT1               | C26 vs. C26 + GW    | 0.0018  | Yes |
| 4 | G, CPT2               | Saline vs. C26      | 0.7068  | No  |
| 4 | G, CPT2               | Saline vs. C26 + GW | <0.0001 | Yes |
| 4 | G, CPT2               | C26 vs. C26 + GW    | 0.0001  | Yes |
| 4 | G, LCADH              | Saline vs. C26      | 0.001   | Yes |
| 4 | G, LCADH              | Saline vs. C26 + GW | 0.8868  | No  |
| 4 | G, LCADH              | C26 vs. C26 + GW    | 0.0013  | Yes |
| 4 | G, $\beta$ -Oxidation | Saline vs. C26      | 0.0708  | No  |
| 4 | G, $\beta$ -Oxidation | Saline vs. C26 + GW | 0.3957  | No  |
| 4 | G, $\beta$ -Oxidation | C26 vs. C26 + GW    | 0.0129  | Yes |

Abbreviations: GW, GW274150.

**Appendix Table S5. Significance p-values for Figure 5.**

| Figure | Panel     | Comparison           | p-value | Significant? |
|--------|-----------|----------------------|---------|--------------|
| 5      | B         | NT vs. GW100         | 0.6031  | No           |
| 5      | B         | NT vs. IT            | 0.0007  | Yes          |
| 5      | B         | NT vs. IT+GW100      | 0.8074  | No           |
| 5      | B         | GW100 vs. IT         | 0.0017  | Yes          |
| 5      | B         | GW100 vs. IT+GW100   | 0.4487  | No           |
| 5      | B         | IT vs. IT+GW100      | 0.0004  | Yes          |
| 5      | C, bottom | NT vs. GW10          | >0.9999 | No           |
| 5      | C, bottom | NT vs. GW100         | 0.9712  | No           |
| 5      | C, bottom | NT vs. IT            | <0.0001 | Yes          |
| 5      | C, bottom | NT vs. IT+GW10       | <0.0001 | Yes          |
| 5      | C, bottom | NT vs. IT+GW100      | 0.0789  | No           |
| 5      | C, bottom | GW10 vs. GW100       | 0.9712  | No           |
| 5      | C, bottom | GW10 vs. IT          | <0.0001 | Yes          |
| 5      | C, bottom | GW10 vs. IT+GW10     | <0.0001 | Yes          |
| 5      | C, bottom | GW10 vs. IT+GW100    | 0.0789  | No           |
| 5      | C, bottom | GW100 vs. IT         | <0.0001 | Yes          |
| 5      | C, bottom | GW100 vs. IT+GW10    | <0.0001 | Yes          |
| 5      | C, bottom | GW100 vs. IT+GW100   | 0.074   | No           |
| 5      | C, bottom | IT vs. IT+GW10       | 0.1302  | No           |
| 5      | C, bottom | IT vs. IT+GW100      | 0.0001  | Yes          |
| 5      | C, bottom | IT+GW10 vs. IT+GW100 | 0.0019  | Yes          |
| 5      | F, left   | NT vs. GW10          | 0.691   | No           |
| 5      | F, left   | NT vs. GW100         | 0.564   | No           |
| 5      | F, left   | NT vs. IT            | 0.0147  | Yes          |
| 5      | F, left   | NT vs. IT+GW10       | 0.0619  | No           |
| 5      | F, left   | NT vs. IT+GW100      | 0.6281  | No           |
| 5      | F, left   | GW10 vs. GW100       | 0.8554  | No           |
| 5      | F, left   | GW10 vs. IT          | 0.0312  | Yes          |
| 5      | F, left   | GW10 vs. IT+GW10     | 0.1245  | No           |
| 5      | F, left   | GW10 vs. IT+GW100    | 0.9299  | No           |
| 5      | F, left   | GW100 vs. IT         | 0.0438  | Yes          |
| 5      | F, left   | GW100 vs. IT+GW10    | 0.1685  | No           |
| 5      | F, left   | GW100 vs. IT+GW100   | 0.9249  | No           |
| 5      | F, left   | IT vs. IT+GW10       | 0.4463  | No           |
| 5      | F, left   | IT vs. IT+GW100      | 0.0368  | Yes          |
| 5      | F, left   | IT+GW10 vs. IT+GW100 | 0.1443  | No           |
| 5      | F, right  | NT vs. GW10          | 0.581   | No           |
| 5      | F, right  | NT vs. GW100         | 0.4961  | No           |
| 5      | F, right  | NT vs. IT            | 0.005   | Yes          |
| 5      | F, right  | NT vs. IT+GW10       | 0.0164  | Yes          |
| 5      | F, right  | NT vs. IT+GW100      | 0.2289  | No           |

|   |          |                      |        |     |
|---|----------|----------------------|--------|-----|
| 5 | F, right | GW10 vs. GW100       | 0.8952 | No  |
| 5 | F, right | GW10 vs. IT          | 0.0143 | Yes |
| 5 | F, right | GW10 vs. IT+GW10     | 0.0463 | Yes |
| 5 | F, right | GW10 vs. IT+GW100    | 0.497  | No  |
| 5 | F, right | GW100 vs. IT         | 0.0183 | Yes |
| 5 | F, right | GW100 vs. IT+GW10    | 0.0589 | No  |
| 5 | F, right | GW100 vs. IT+GW100   | 0.5819 | No  |
| 5 | F, right | IT vs. IT+GW10       | 0.5335 | No  |
| 5 | F, right | IT vs. IT+GW100      | 0.0515 | No  |
| 5 | F, right | IT+GW10 vs. IT+GW100 | 0.1542 | No  |
| 5 | G        | NT vs. GW10          | 0.747  | No  |
| 5 | G        | NT vs. GW100         | 0.2054 | No  |
| 5 | G        | NT vs. IT            | 0.0174 | Yes |
| 5 | G        | NT vs. IT+GW10       | 0.125  | No  |
| 5 | G        | NT vs. IT+GW100      | 0.5683 | No  |
| 5 | G        | GW10 vs. GW100       | 0.333  | No  |
| 5 | G        | GW10 vs. IT          | 0.0094 | Yes |
| 5 | G        | GW10 vs. IT+GW10     | 0.0712 | No  |
| 5 | G        | GW10 vs. IT+GW100    | 0.802  | No  |
| 5 | G        | GW100 vs. IT         | 0.0015 | Yes |
| 5 | G        | GW100 vs. IT+GW10    | 0.0113 | Yes |
| 5 | G        | GW100 vs. IT+GW100   | 0.4663 | No  |
| 5 | G        | IT vs. IT+GW10       | 0.2901 | No  |
| 5 | G        | IT vs. IT+GW100      | 0.0059 | Yes |
| 5 | G        | IT+GW10 vs. IT+GW100 | 0.0451 | Yes |
| 5 | I, left  | NT vs. GW10          | 0.3758 | No  |
| 5 | I, left  | NT vs. GW100         | 0.3573 | No  |
| 5 | I, left  | NT vs. IT            | 0.0001 | Yes |
| 5 | I, left  | NT vs. IT+GW10       | 0.0145 | Yes |
| 5 | I, left  | NT vs. IT+GW100      | 0.2896 | No  |
| 5 | I, left  | GW10 vs. GW100       | 0.9715 | No  |
| 5 | I, left  | GW10 vs. IT          | 0.0014 | Yes |
| 5 | I, left  | GW10 vs. IT+GW10     | 0.096  | No  |
| 5 | I, left  | GW10 vs. IT+GW100    | 0.8583 | No  |
| 5 | I, left  | GW100 vs. IT         | 0.0015 | Yes |
| 5 | I, left  | GW100 vs. IT+GW10    | 0.1027 | No  |
| 5 | I, left  | GW100 vs. IT+GW100   | 0.8864 | No  |
| 5 | I, left  | IT vs. IT+GW10       | 0.071  | No  |
| 5 | I, left  | IT vs. IT+GW100      | 0.0021 | Yes |
| 5 | I, left  | IT+GW10 vs. IT+GW100 | 0.1337 | No  |
| 5 | I, right | NT vs. GW10          | 0.6155 | No  |
| 5 | I, right | NT vs. GW100         | 0.8606 | No  |
| 5 | I, right | NT vs. IT            | 0.0003 | Yes |

|   |          |                      |        |     |
|---|----------|----------------------|--------|-----|
| 5 | l, right | NT vs. IT+GW10       | 0.0098 | Yes |
| 5 | l, right | NT vs. IT+GW100      | 0.1082 | No  |
| 5 | l, right | GW10 vs. GW100       | 0.4991 | No  |
| 5 | l, right | GW10 vs. IT          | 0.0012 | Yes |
| 5 | l, right | GW10 vs. IT+GW10     | 0.0307 | Yes |
| 5 | l, right | GW10 vs. IT+GW100    | 0.2576 | No  |
| 5 | l, right | GW100 vs. IT         | 0.0002 | Yes |
| 5 | l, right | GW100 vs. IT+GW10    | 0.0065 | Yes |
| 5 | l, right | GW100 vs. IT+GW100   | 0.0773 | No  |
| 5 | l, right | IT vs. IT+GW10       | 0.179  | No  |
| 5 | l, right | IT vs. IT+GW100      | 0.0188 | Yes |
| 5 | l, right | IT+GW10 vs. IT+GW100 | 0.2672 | No  |

Abbreviations: NT, non-treated. GW, GW274150. IT, IFN $\gamma$ /TNF $\alpha$ .

**Appendix Table S6. Significance p-values for Figure 6.**

| Figure | Panel    | Comparison           | p-value | Significant? |
|--------|----------|----------------------|---------|--------------|
| 6      | B, right | NT vs. GW10          | 0.392   | No           |
| 6      | B, right | NT vs. GW100         | 0.3495  | No           |
| 6      | B, right | NT vs. IT            | <0.0001 | Yes          |
| 6      | B, right | NT vs. IT+GW10       | 0.016   | Yes          |
| 6      | B, right | NT vs. IT+GW100      | 0.2457  | No           |
| 6      | B, right | GW10 vs. GW100       | 0.0873  | No           |
| 6      | B, right | GW10 vs. IT          | 0.0001  | Yes          |
| 6      | B, right | GW10 vs. IT+GW10     | 0.0797  | No           |
| 6      | B, right | GW10 vs. IT+GW100    | 0.0567  | No           |
| 6      | B, right | GW100 vs. IT         | <0.0001 | Yes          |
| 6      | B, right | GW100 vs. IT+GW10    | 0.0026  | Yes          |
| 6      | B, right | GW100 vs. IT+GW100   | 0.809   | No           |
| 6      | B, right | IT vs. IT+GW10       | 0.0038  | Yes          |
| 6      | B, right | IT vs. IT+GW100      | <0.0001 | Yes          |
| 6      | B, right | IT+GW10 vs. IT+GW100 | 0.0017  | Yes          |
| 6      | C        | NT vs. GW10          | >0.9999 | No           |
| 6      | C        | NT vs. GW100         | 0.4618  | No           |
| 6      | C        | NT vs. IT            | <0.0001 | Yes          |
| 6      | C        | NT vs. IT+GW10       | <0.0001 | Yes          |
| 6      | C        | NT vs. IT+GW100      | 0.0321  | Yes          |
| 6      | C        | GW10 vs. GW100       | 0.4618  | No           |
| 6      | C        | GW10 vs. IT          | <0.0001 | Yes          |
| 6      | C        | GW10 vs. IT+GW10     | <0.0001 | Yes          |
| 6      | C        | GW10 vs. IT+GW100    | 0.0321  | Yes          |
| 6      | C        | GW100 vs. IT         | <0.0001 | Yes          |
| 6      | C        | GW100 vs. IT+GW10    | <0.0001 | Yes          |
| 6      | C        | GW100 vs. IT+GW100   | 0.1222  | No           |
| 6      | C        | IT vs. IT+GW10       | 0.001   | Yes          |
| 6      | C        | IT vs. IT+GW100      | <0.0001 | Yes          |
| 6      | C        | IT+GW10 vs. IT+GW100 | 0.0003  | Yes          |
| 6      | D        | NT vs. GW10          | 0.5644  | No           |
| 6      | D        | NT vs. GW100         | 0.9346  | No           |
| 6      | D        | NT vs. IT            | <0.0001 | Yes          |
| 6      | D        | NT vs. IT+GW10       | 0.001   | Yes          |
| 6      | D        | NT vs. IT+GW100      | 0.0139  | Yes          |
| 6      | D        | GW10 vs. GW100       | 0.5116  | No           |
| 6      | D        | GW10 vs. IT          | <0.0001 | Yes          |
| 6      | D        | GW10 vs. IT+GW10     | 0.0028  | Yes          |
| 6      | D        | GW10 vs. IT+GW100    | 0.0412  | Yes          |
| 6      | D        | GW100 vs. IT         | <0.0001 | Yes          |
| 6      | D        | GW100 vs. IT+GW10    | 0.0008  | Yes          |

|   |   |                      |        |     |
|---|---|----------------------|--------|-----|
| 6 | D | GW100 vs. IT+GW100   | 0.0119 | Yes |
| 6 | D | IT vs. IT+GW10       | 0.0478 | Yes |
| 6 | D | IT vs. IT+GW100      | 0.0033 | Yes |
| 6 | D | IT+GW10 vs. IT+GW100 | 0.1719 | No  |

Abbreviations: NT, non-treated. GW, GW274150. IT, IFN $\gamma$ /TNF $\alpha$ .

**Appendix Table S7. Significance p-values for Figure 7.**

| Figure | Panel    | Comparison           | p-value | Significant? |
|--------|----------|----------------------|---------|--------------|
| 7      | B, left  | NT vs. GW10          | 0.5404  | No           |
| 7      | B, left  | NT vs. GW100         | 0.7032  | No           |
| 7      | B, left  | NT vs. IT            | <0.0001 | Yes          |
| 7      | B, left  | NT vs. IT+GW10       | 0.0002  | Yes          |
| 7      | B, left  | NT vs. IT+GW100      | 0.0398  | Yes          |
| 7      | B, left  | GW10 vs. GW100       | 0.3253  | No           |
| 7      | B, left  | GW10 vs. IT          | 0.0003  | Yes          |
| 7      | B, left  | GW10 vs. IT+GW10     | 0.0008  | Yes          |
| 7      | B, left  | GW10 vs. IT+GW100    | 0.1286  | No           |
| 7      | B, left  | GW100 vs. IT         | <0.0001 | Yes          |
| 7      | B, left  | GW100 vs. IT+GW10    | <0.0001 | Yes          |
| 7      | B, left  | GW100 vs. IT+GW100   | 0.0179  | Yes          |
| 7      | B, left  | IT vs. IT+GW10       | 0.612   | No           |
| 7      | B, left  | IT vs. IT+GW100      | 0.0088  | Yes          |
| 7      | B, left  | IT+GW10 vs. IT+GW100 | 0.0262  | Yes          |
| 7      | B, right | NT vs. GW10          | 0.4624  | No           |
| 7      | B, right | NT vs. GW100         | 0.112   | No           |
| 7      | B, right | NT vs. IT            | <0.0001 | Yes          |
| 7      | B, right | NT vs. IT+GW10       | <0.0001 | Yes          |
| 7      | B, right | NT vs. IT+GW100      | 0.0002  | Yes          |
| 7      | B, right | GW10 vs. GW100       | 0.3697  | No           |
| 7      | B, right | GW10 vs. IT          | <0.0001 | Yes          |
| 7      | B, right | GW10 vs. IT+GW10     | <0.0001 | Yes          |
| 7      | B, right | GW10 vs. IT+GW100    | 0.0011  | Yes          |
| 7      | B, right | GW100 vs. IT         | <0.0001 | Yes          |
| 7      | B, right | GW100 vs. IT+GW10    | <0.0001 | Yes          |
| 7      | B, right | GW100 vs. IT+GW100   | 0.0085  | Yes          |
| 7      | B, right | IT vs. IT+GW10       | 0.3868  | No           |
| 7      | B, right | IT vs. IT+GW100      | <0.0001 | Yes          |
| 7      | B, right | IT+GW10 vs. IT+GW100 | 0.0003  | Yes          |

Abbreviations: NT, non-treated. GW, GW274150. IT, IFN $\gamma$ /TNF $\alpha$ .

**Appendix Table S8. Significance p-values for Figure EV1.**

| Figure | Panel | Comparison              | p-value | Significant? |
|--------|-------|-------------------------|---------|--------------|
| EV1    | A     | WT Saline vs. WT LPS    | <0.0001 | Yes          |
| EV1    | A     | WT Saline vs. KO Saline | 0.7346  | No           |
| EV1    | A     | WT Saline vs. KO LPS    | <0.0001 | Yes          |
| EV1    | A     | WT LPS vs. KO Saline    | <0.0001 | Yes          |
| EV1    | A     | WT LPS vs. KO LPS       | 0.6921  | No           |
| EV1    | A     | KO Saline vs. KO LPS    | <0.0001 | Yes          |
| EV1    | C     | WT Saline vs. WT LPS    | 0.0004  | Yes          |
| EV1    | C     | WT Saline vs. KO Saline | 0.7716  | No           |
| EV1    | C     | WT Saline vs. KO LPS    | 0.0013  | Yes          |
| EV1    | C     | WT LPS vs. KO Saline    | 0.0018  | Yes          |
| EV1    | C     | WT LPS vs. KO LPS       | 0.904   | No           |
| EV1    | C     | KO Saline vs. KO LPS    | 0.0046  | Yes          |
| EV1    | D     | WT Saline vs. WT LPS    | <0.0001 | Yes          |
| EV1    | D     | WT Saline vs. KO Saline | 0.7536  | No           |
| EV1    | D     | WT Saline vs. KO LPS    | 0.0002  | Yes          |
| EV1    | D     | WT LPS vs. KO Saline    | 0.0002  | Yes          |
| EV1    | D     | WT LPS vs. KO LPS       | 0.7481  | No           |
| EV1    | D     | KO Saline vs. KO LPS    | 0.0008  | Yes          |
| EV1    | E     | WT Saline vs. WT LPS    | 0.0369  | Yes          |
| EV1    | E     | KO Saline vs. KO LPS    | 0.0601  | No           |
| EV1    | F     | WT Saline vs. WT LPS    | 0.3227  | No           |
| EV1    | F     | KO Saline vs. KO LPS    | 0.6345  | No           |
| EV1    | G     | WT Saline vs. WT LPS    | 0.472   | No           |
| EV1    | G     | KO Saline vs. KO LPS    | 0.5961  | No           |
| EV1    | H     | WT Saline vs. WT LPS    | 0.0279  | Yes          |
| EV1    | H     | KO Saline vs. KO LPS    | 0.0965  | No           |
| EV1    | I     | WT Saline vs. WT LPS    | 0.0008  | Yes          |
| EV1    | I     | KO Saline vs. KO LPS    | 0.0081  | Yes          |

Abbreviations: WT, Wild-type. KO, iNOS Knockout. LPS, Lipopolysaccharide.



**Appendix Table S9. Significance p-values for Figure EV2.**

| Figure | Panel | Comparison              | p-value | Significant? |
|--------|-------|-------------------------|---------|--------------|
| EV2    | A     | WT Saline vs. WT LPS    | 0.2982  | No           |
| EV2    | A     | WT Saline vs. KO Saline | 0.9812  | No           |
| EV2    | A     | WT Saline vs. KO LPS    | 0.0618  | No           |
| EV2    | A     | WT LPS vs. KO Saline    | 0.3091  | No           |
| EV2    | A     | WT LPS vs. KO LPS       | 0.3956  | No           |
| EV2    | A     | KO Saline vs. KO LPS    | 0.065   | No           |
| EV2    | B     | WT Saline vs. WT LPS    | 0.9479  | No           |
| EV2    | B     | WT Saline vs. KO Saline | 0.7501  | No           |
| EV2    | B     | WT Saline vs. KO LPS    | 0.4338  | No           |
| EV2    | B     | WT LPS vs. KO Saline    | 0.8001  | No           |
| EV2    | B     | WT LPS vs. KO LPS       | 0.4729  | No           |
| EV2    | B     | KO Saline vs. KO LPS    | 0.6414  | No           |
| EV2    | C     | WT Saline vs. WT LPS    | 0.0017  | Yes          |
| EV2    | C     | KO Saline vs. KO LPS    | 0.4854  | No           |

Abbreviations: WT, Wild-type. KO, iNOS Knockout. LPS, Lipopolysaccharide.

**Appendix Table S10. Significance p-values for Figure EV3.**

| Figure | Panel | Comparison          | p-value | Significant? |
|--------|-------|---------------------|---------|--------------|
| EV3    | B     | Saline vs. C26      | <0.0001 | Yes          |
| EV3    | B     | Saline vs. GW       | 0.9261  | No           |
| EV3    | B     | Saline vs. C26 + GW | <0.0001 | Yes          |
| EV3    | B     | C26 vs. GW          | <0.0001 | Yes          |
| EV3    | B     | C26 vs. C26 + GW    | 0.9596  | No           |
| EV3    | B     | GW vs. C26 + GW     | <0.0001 | Yes          |
| EV3    | C     | Saline vs. C26      | 0.0133  | Yes          |
| EV3    | C     | Saline vs. GW       | 0.3978  | No           |
| EV3    | C     | Saline vs. C26 + GW | 0.0007  | Yes          |
| EV3    | C     | C26 vs. GW          | 0.0736  | No           |
| EV3    | C     | C26 vs. C26 + GW    | 0.1782  | No           |
| EV3    | C     | GW vs. C26 + GW     | 0.0043  | Yes          |
| EV3    | D     | Saline vs. C26      | 0.3978  | No           |
| EV3    | D     | Saline vs. GW       | 0.4581  | No           |
| EV3    | D     | Saline vs. C26 + GW | 0.4926  | No           |
| EV3    | D     | C26 vs. GW          | 0.1208  | No           |
| EV3    | D     | C26 vs. C26 + GW    | 0.8706  | No           |
| EV3    | D     | GW vs. C26 + GW     | 0.1611  | No           |
| EV3    | E     | Saline vs. C26      | 0.0002  | Yes          |
| EV3    | E     | Saline vs. GW       | 0.4356  | No           |
| EV3    | E     | Saline vs. C26 + GW | 0.6234  | No           |
| EV3    | E     | C26 vs. GW          | <0.0001 | Yes          |
| EV3    | E     | C26 vs. C26 + GW    | 0.0006  | Yes          |
| EV3    | E     | GW vs. C26 + GW     | 0.2103  | No           |
| EV3    | F     | Saline vs. C26      | 0.0002  | Yes          |
| EV3    | F     | Saline vs. GW       | 0.4821  | No           |
| EV3    | F     | Saline vs. C26 + GW | 0.184   | No           |
| EV3    | F     | C26 vs. GW          | 0.0013  | Yes          |
| EV3    | F     | C26 vs. C26 + GW    | 0.006   | Yes          |
| EV3    | F     | GW vs. C26 + GW     | 0.5168  | No           |
| EV3    | G     | Saline vs. C26      | 0.1511  | No           |
| EV3    | G     | Saline vs. GW       | 0.3265  | No           |
| EV3    | G     | Saline vs. C26 + GW | 0.7186  | No           |
| EV3    | G     | C26 vs. GW          | 0.0219  | Yes          |
| EV3    | G     | C26 vs. C26 + GW    | 0.105   | No           |
| EV3    | G     | GW vs. C26 + GW     | 0.5985  | No           |
| EV3    | H     | Saline vs. C26      | 0.0004  | Yes          |
| EV3    | H     | Saline vs. GW       | 0.1141  | No           |
| EV3    | H     | Saline vs. C26 + GW | 0.0002  | Yes          |
| EV3    | H     | C26 vs. GW          | 0.0173  | Yes          |
| EV3    | H     | C26 vs. C26 + GW    | 0.8213  | No           |

|     |   |                    |         |     |
|-----|---|--------------------|---------|-----|
| EV3 | H | GW vs. C26 + GW    | 0.0105  | Yes |
| EV3 | I | Saline vs C26      | <0.0001 | Yes |
| EV3 | I | Saline vs GW       | 0.0022  | Yes |
| EV3 | I | Saline vs C26 + GW | <0.0001 | Yes |
| EV3 | I | GW vs C26 + GW     | <0.0001 | Yes |
| EV3 | I | C26 vs C26 + GW    | <0.0001 | Yes |

Abbreviations: GW, GW274150.

**Appendix Table S11. Significance p-values for Figure EV4.**

| Figure | Panel | Comparison              | p-value | Significant? |
|--------|-------|-------------------------|---------|--------------|
| EV4    | B     | NT vs. AMG100           | 0.2743  | No           |
| EV4    | B     | NT vs. AMG400           | 0.7906  | No           |
| EV4    | B     | NT vs. IT               | 0.1465  | No           |
| EV4    | B     | NT vs. IT+AMG100        | 0.7981  | No           |
| EV4    | B     | NT vs. IT+AMG400        | 0.9045  | No           |
| EV4    | B     | AMG100 vs. AMG400       | 0.3993  | No           |
| EV4    | B     | AMG100 vs. IT           | 0.0194  | Yes          |
| EV4    | B     | AMG100 vs. IT+AMG100    | 0.3941  | No           |
| EV4    | B     | AMG100 vs. IT+AMG400    | 0.3265  | No           |
| EV4    | B     | AMG400 vs. IT           | 0.0931  | No           |
| EV4    | B     | AMG400 vs. IT+AMG100    | 0.9922  | No           |
| EV4    | B     | AMG400 vs. IT+AMG400    | 0.884   | No           |
| EV4    | B     | IT vs. IT+AMG100        | 0.0947  | No           |
| EV4    | B     | IT vs. IT+AMG400        | 0.1197  | No           |
| EV4    | B     | IT+AMG100 vs. IT+AMG400 | 0.8917  | No           |
| EV4    | C     | NT vs. AMG100           | 0.7115  | No           |
| EV4    | C     | NT vs. AMG400           | 0.1703  | No           |
| EV4    | C     | NT vs. IT               | <0.0001 | Yes          |
| EV4    | C     | NT vs. IT+AMG100        | 0.0009  | Yes          |
| EV4    | C     | NT vs. IT+AMG400        | 0.1432  | No           |
| EV4    | C     | AMG100 vs. AMG400       | 0.091   | No           |
| EV4    | C     | AMG100 vs. IT           | <0.0001 | Yes          |
| EV4    | C     | AMG100 vs. IT+AMG100    | 0.0005  | Yes          |
| EV4    | C     | AMG100 vs. IT+AMG400    | 0.0755  | No           |
| EV4    | C     | AMG400 vs. IT           | 0.0002  | Yes          |
| EV4    | C     | AMG400 vs. IT+AMG100    | 0.0126  | Yes          |
| EV4    | C     | AMG400 vs. IT+AMG400    | 0.9161  | No           |
| EV4    | C     | IT vs. IT+AMG100        | 0.0474  | Yes          |
| EV4    | C     | IT vs. IT+AMG400        | 0.0003  | Yes          |
| EV4    | C     | IT+AMG100 vs. IT+AMG400 | 0.0154  | Yes          |
| EV4    | D     | NT vs. AMG100           | 0.5085  | No           |
| EV4    | D     | NT vs. AMG400           | 0.8605  | No           |
| EV4    | D     | NT vs. IT               | 0.6102  | No           |
| EV4    | D     | NT vs. IT+AMG100        | 0.5198  | No           |
| EV4    | D     | NT vs. IT+AMG400        | 0.1709  | No           |
| EV4    | D     | AMG100 vs. AMG400       | 0.6248  | No           |
| EV4    | D     | AMG100 vs. IT           | 0.2514  | No           |
| EV4    | D     | AMG100 vs. IT+AMG100    | 0.9856  | No           |
| EV4    | D     | AMG100 vs. IT+AMG400    | 0.4532  | No           |
| EV4    | D     | AMG400 vs. IT           | 0.4954  | No           |
| EV4    | D     | AMG400 vs. IT+AMG100    | 0.6374  | No           |

|     |   |                         |         |     |
|-----|---|-------------------------|---------|-----|
| EV4 | D | AMG400 vs. IT+AMG400    | 0.2257  | No  |
| EV4 | D | IT vs. IT+AMG100        | 0.2584  | No  |
| EV4 | D | IT vs. IT+AMG400        | 0.0711  | No  |
| EV4 | D | IT+AMG100 vs. IT+AMG400 | 0.4428  | No  |
| EV4 | E | NT vs. AMG100           | 0.5051  | No  |
| EV4 | E | NT vs. AMG400           | 0.0424  | Yes |
| EV4 | E | NT vs. IT               | <0.0001 | Yes |
| EV4 | E | NT vs. IT+AMG100        | 0.0002  | Yes |
| EV4 | E | NT vs. IT+AMG400        | 0.2482  | No  |
| EV4 | E | AMG100 vs. AMG400       | 0.1393  | No  |
| EV4 | E | AMG100 vs. IT           | <0.0001 | Yes |
| EV4 | E | AMG100 vs. IT+AMG100    | 0.0006  | Yes |
| EV4 | E | AMG100 vs. IT+AMG400    | 0.608   | No  |
| EV4 | E | AMG400 vs. IT           | <0.0001 | Yes |
| EV4 | E | AMG400 vs. IT+AMG100    | 0.0103  | Yes |
| EV4 | E | AMG400 vs. IT+AMG400    | 0.3114  | No  |
| EV4 | E | IT vs. IT+AMG100        | 0.0033  | Yes |
| EV4 | E | IT vs. IT+AMG400        | <0.0001 | Yes |
| EV4 | E | IT+AMG100 vs. IT+AMG400 | 0.0015  | Yes |
| EV4 | F | NT vs. AMG100           | 0.2547  | No  |
| EV4 | F | NT vs. AMG400           | 0.4646  | No  |
| EV4 | F | NT vs. IT               | 0.756   | No  |
| EV4 | F | NT vs. IT+AMG100        | 0.3208  | No  |
| EV4 | F | NT vs. IT+AMG400        | 0.4538  | No  |
| EV4 | F | AMG100 vs. AMG400       | 0.6671  | No  |
| EV4 | F | AMG100 vs. IT           | 0.3969  | No  |
| EV4 | F | AMG100 vs. IT+AMG100    | 0.875   | No  |
| EV4 | F | AMG100 vs. IT+AMG400    | 0.6804  | No  |
| EV4 | F | AMG400 vs. IT           | 0.6695  | No  |
| EV4 | F | AMG400 vs. IT+AMG100    | 0.784   | No  |
| EV4 | F | AMG400 vs. IT+AMG400    | 0.9853  | No  |
| EV4 | F | IT vs. IT+AMG100        | 0.4866  | No  |
| EV4 | F | IT vs. IT+AMG400        | 0.6563  | No  |
| EV4 | F | IT+AMG100 vs. IT+AMG400 | 0.7981  | No  |

Abbreviations: NT, non-treated. AMG, Aminoguanidine. IT, IFN $\gamma$ /TNF $\alpha$ .

**Appendix Table S12. Significance p-values for Appendix Figure 4.**

| Figure         | Panel | Comparison              | p-value | Significant? |
|----------------|-------|-------------------------|---------|--------------|
| Appendix Fig 4 | A     | WT Saline vs. WT LPS    | <0.0001 | Yes          |
| Appendix Fig 4 | A     | WT Saline vs. KO Saline | 0.7367  | No           |
| Appendix Fig 4 | A     | WT Saline vs. KO LPS    | <0.0001 | Yes          |
| Appendix Fig 4 | A     | WT Saline vs. WT LPS GW | <0.0001 | Yes          |
| Appendix Fig 4 | A     | WT LPS vs. KO Saline    | <0.0001 | Yes          |
| Appendix Fig 4 | A     | WT LPS vs. KO LPS       | 0.6944  | No           |
| Appendix Fig 4 | A     | WT LPS vs. WT LPS GW    | 0.7026  | No           |
| Appendix Fig 4 | A     | KO Saline vs. KO LPS    | <0.0001 | Yes          |
| Appendix Fig 4 | A     | KO Saline vs. WT LPS GW | <0.0001 | Yes          |
| Appendix Fig 4 | A     | KO LPS vs. WT LPS GW    | 0.9568  | No           |
| Appendix Fig 4 | B     | WT Saline vs. WT LPS    | 0.2828  | No           |
| Appendix Fig 4 | B     | WT Saline vs. KO Saline | 0.9806  | No           |
| Appendix Fig 4 | B     | WT Saline vs. KO LPS    | 0.0537  | No           |
| Appendix Fig 4 | B     | WT Saline vs. WT LPS GW | 0.0025  | Yes          |
| Appendix Fig 4 | B     | WT LPS vs. KO Saline    | 0.2937  | No           |
| Appendix Fig 4 | B     | WT LPS vs. KO LPS       | 0.3805  | No           |
| Appendix Fig 4 | B     | WT LPS vs. WT LPS GW    | 0.0284  | Yes          |
| Appendix Fig 4 | B     | KO Saline vs. KO LPS    | 0.0566  | No           |
| Appendix Fig 4 | B     | KO Saline vs. WT LPS GW | 0.0027  | Yes          |
| Appendix Fig 4 | B     | KO LPS vs. WT LPS GW    | 0.1367  | No           |
| Appendix Fig 4 | C     | WT Saline vs. WT LPS    | 0.0014  | Yes          |
| Appendix Fig 4 | C     | WT Saline vs. KO Saline | 0.477   | No           |
| Appendix Fig 4 | C     | WT Saline vs. KO LPS    | 0.3679  | No           |
| Appendix Fig 4 | C     | WT Saline vs. WT LPS GW | 0.7929  | No           |
| Appendix Fig 4 | C     | WT LPS vs. KO Saline    | 0.011   | Yes          |
| Appendix Fig 4 | C     | WT LPS vs. KO LPS       | 0.018   | Yes          |
| Appendix Fig 4 | C     | WT LPS vs. WT LPS GW    | 0.0143  | Yes          |
| Appendix Fig 4 | C     | KO Saline vs. KO LPS    | 0.8487  | No           |
| Appendix Fig 4 | C     | KO Saline vs. WT LPS GW | 0.7402  | No           |
| Appendix Fig 4 | C     | KO LPS vs. WT LPS GW    | 0.6239  | No           |
| Appendix Fig 4 | D     | WT Saline vs. WT LPS    | <0.0001 | Yes          |
| Appendix Fig 4 | D     | WT Saline vs. KO Saline | 0.906   | No           |
| Appendix Fig 4 | D     | WT Saline vs. KO LPS    | 0.6605  | No           |
| Appendix Fig 4 | D     | WT Saline vs. WT LPS GW | 0.8179  | No           |
| Appendix Fig 4 | D     | WT LPS vs. KO Saline    | <0.0001 | Yes          |
| Appendix Fig 4 | D     | WT LPS vs. KO LPS       | 0.0001  | Yes          |
| Appendix Fig 4 | D     | WT LPS vs. WT LPS GW    | 0.0002  | Yes          |
| Appendix Fig 4 | D     | KO Saline vs. KO LPS    | 0.6015  | No           |
| Appendix Fig 4 | D     | KO Saline vs. WT LPS GW | 0.7465  | No           |
| Appendix Fig 4 | D     | KO LPS vs. WT LPS GW    | 0.8608  | No           |

Abbreviations: WT, Wild-type. KO, iNOS Knockout. LPS, Lipopolysaccharide. GW, GW 274150

**Appendix Table S13. Significance p-values for Appendix Figure 5.**

| Figure         | Panel                                                  | Comparison   | p-value  | Significant? |
|----------------|--------------------------------------------------------|--------------|----------|--------------|
| Appendix Fig 5 | A, Arginine biosynthesis                               | Saline vs GW | 0.03538  | Yes          |
| Appendix Fig 5 | A, D-Glutamine and D-glutamate metabolism              | Saline vs GW | 0.04436  | Yes          |
| Appendix Fig 5 | A, Histidine metabolism                                | Saline vs GW | 0.078932 | No           |
| Appendix Fig 5 | A, Tyrosine metabolism                                 | Saline vs GW | 0.083479 | No           |
| Appendix Fig 5 | A, Arginine and proline metabolism                     | Saline vs GW | 0.093298 | No           |
| Appendix Fig 5 | A, Cysteine and methionine metabolism                  | Saline vs GW | 0.12038  | No           |
| Appendix Fig 5 | A, Alanine, aspartate and glutamate metabolism         | Saline vs GW | 0.16577  | No           |
| Appendix Fig 5 | A, Aminoacyl-tRNA biosynthesis                         | Saline vs GW | 0.16687  | No           |
| Appendix Fig 5 | A, Phenylalanine metabolism                            | Saline vs GW | 0.17065  | No           |
| Appendix Fig 5 | A, Citrate cycle (TCA cycle)                           | Saline vs GW | 0.17229  | No           |
| Appendix Fig 5 | A, Glutathione metabolism                              | Saline vs GW | 0.17556  | No           |
| Appendix Fig 5 | A, Glyoxylate and dicarboxylate metabolism             | Saline vs GW | 0.17565  | No           |
| Appendix Fig 5 | A, Phenylalanine, tyrosine and tryptophan biosynthesis | Saline vs GW | 0.2085   | No           |
| Appendix Fig 5 | A, Glycine, serine and threonine metabolism            | Saline vs GW | 0.22846  | No           |
| Appendix Fig 5 | A, Pyruvate metabolism                                 | Saline vs GW | 0.31862  | No           |
| Appendix Fig 5 | A, Tryptophan metabolism                               | Saline vs GW | 0.34651  | No           |
| Appendix Fig 5 | A, Glycerophospholipid metabolism                      | Saline vs GW | 0.39109  | No           |
| Appendix Fig 5 | A, Taurine and hypotaurine metabolism                  | Saline vs GW | 0.45686  | No           |
| Appendix Fig 5 | A, beta-Alanine metabolism                             | Saline vs GW | 0.48959  | No           |
| Appendix Fig 5 | A, Glycolysis / Gluconeogenesis                        | Saline vs GW | 0.52245  | No           |

Abbreviations: GW, GW274150.

**Appendix Table S14. Significance p-values for Appendix Figure 7.**

| Figure         | Panel  | Comparison          | p-value | Significant? |
|----------------|--------|---------------------|---------|--------------|
| Appendix Fig 7 | B, C0  | Saline vs. C26      | 0.0141  | Yes          |
| Appendix Fig 7 | B, C0  | Saline vs. C26 + GW | 0.2325  | No           |
| Appendix Fig 7 | B, C0  | C26 vs. C26 + GW    | 0.1462  | No           |
| Appendix Fig 7 | B, C10 | Saline vs. C26      | >0.9999 | No           |
| Appendix Fig 7 | B, C10 | Saline vs. C26 + GW | 0.0013  | Yes          |
| Appendix Fig 7 | B, C10 | C26 vs. C26 + GW    | 0.0013  | Yes          |
| Appendix Fig 7 | B, C12 | Saline vs. C26      | 0.0159  | Yes          |
| Appendix Fig 7 | B, C12 | Saline vs. C26 + GW | 0.9811  | No           |
| Appendix Fig 7 | B, C12 | C26 vs. C26 + GW    | 0.0167  | Yes          |
| Appendix Fig 7 | B, C14 | Saline vs. C26      | 0.0522  | No           |
| Appendix Fig 7 | B, C14 | Saline vs. C26 + GW | 0.2343  | No           |
| Appendix Fig 7 | B, C14 | C26 vs. C26 + GW    | 0.0044  | Yes          |
| Appendix Fig 7 | B, C16 | Saline vs. C26      | 0.0136  | Yes          |
| Appendix Fig 7 | B, C16 | Saline vs. C26 + GW | 0.0506  | No           |
| Appendix Fig 7 | B, C16 | C26 vs. C26 + GW    | 0.0002  | Yes          |
| Appendix Fig 7 | B, C18 | Saline vs. C26      | 0.0056  | Yes          |
| Appendix Fig 7 | B, C18 | Saline vs. C26 + GW | 0.0053  | Yes          |
| Appendix Fig 7 | B, C18 | C26 vs. C26 + GW    | <0.0001 | Yes          |

Abbreviations: GW, GW274150.



**Appendix Table S15. Significance p-values for Appendix Figure 8.**

| Figure         | Panel                 | Comparison    | p-value  | Significant? |
|----------------|-----------------------|---------------|----------|--------------|
| Appendix Fig 8 | B, CPT1               | Saline vs. GW | 0.053199 | No           |
| Appendix Fig 8 | B, CPT2               | Saline vs. GW | 0.009575 | Yes          |
| Appendix Fig 8 | B, LCADH              | Saline vs. GW | 0.069071 | No           |
| Appendix Fig 8 | B, $\beta$ -oxidation | Saline vs. GW | 0.02829  | Yes          |

Abbreviations: GW, GW274150.

**Appendix Table S16. Significance p-values for Appendix Figure 9.**

| Figure         | Comparison                                                                  | p-value | Significant? |
|----------------|-----------------------------------------------------------------------------|---------|--------------|
| Appendix Fig 9 | NT vs. AMG 400 $\mu$ M                                                      | >0.9999 | No           |
| Appendix Fig 9 | NT vs. IFN $\gamma$ /TNF $\alpha$                                           | <0.0001 | Yes          |
| Appendix Fig 9 | NT vs. IFN $\gamma$ /TNF $\alpha$ + AMG 400 $\mu$ M                         | 0.4721  | No           |
| Appendix Fig 9 | AMG 400 $\mu$ M vs. IFN $\gamma$ /TNF $\alpha$                              | <0.0001 | Yes          |
| Appendix Fig 9 | AMG 400 $\mu$ M vs. IFN $\gamma$ /TNF $\alpha$ + AMG 400 $\mu$ M            | 0.4721  | No           |
| Appendix Fig 9 | IFN $\gamma$ /TNF $\alpha$ vs. IFN $\gamma$ /TNF $\alpha$ + AMG 400 $\mu$ M | <0.0001 | Yes          |

Abbreviations: NT, non-treated. AMG, Aminoguanidine.

**Appendix Table S17. Significance p-values for Appendix Figure 10.**

| Figure          | Panel | Comparison     | p-value | Significant? |
|-----------------|-------|----------------|---------|--------------|
| Appendix Fig 10 | B     | NT vs. AMG     | 0.2946  | No           |
| Appendix Fig 10 | B     | NT vs. IT      | 0.0062  | Yes          |
| Appendix Fig 10 | B     | NT vs. IT+AMG  | 0.0988  | No           |
| Appendix Fig 10 | B     | AMG vs. IT     | 0.0336  | Yes          |
| Appendix Fig 10 | B     | AMG vs. IT+AMG | 0.4772  | No           |
| Appendix Fig 10 | B     | IT vs. IT+AMG  | 0.1069  | No           |

Abbreviations: NT, non-treated. AMG, Aminoguanidine. IT, IFN $\gamma$ /TNF $\alpha$ .

**Appendix Table S18. Significance p-values for Appendix Figure 13.**

| Figure          | Panel    | Comparison                   | p-value | Significant? |
|-----------------|----------|------------------------------|---------|--------------|
| Appendix Fig 13 | B, right | NT vs. AMG 400uM             | 0.5327  | No           |
| Appendix Fig 13 | B, right | NT vs. IFN/TNF               | 0.0011  | Yes          |
| Appendix Fig 13 | B, right | NT vs. IFN/TNF+400 uM        | 0.6144  | No           |
| Appendix Fig 13 | B, right | AMG 400uM vs. IFN/TNF        | 0.0003  | Yes          |
| Appendix Fig 13 | B, right | AMG 400uM vs. IFN/TNF+400 uM | 0.254   | No           |
| Appendix Fig 13 | B, right | IFN/TNF vs. IFN/TNF+400 uM   | 0.002   | Yes          |
| Appendix Fig 13 | C        | NT vs. AMG 400uM             | 0.0283  | Yes          |
| Appendix Fig 13 | C        | NT vs. IFN/TNF               | <0.0001 | Yes          |
| Appendix Fig 13 | C        | NT vs. IFN/TNF+400 uM        | <0.0001 | Yes          |
| Appendix Fig 13 | C        | AMG 400uM vs. IFN/TNF        | <0.0001 | Yes          |
| Appendix Fig 13 | C        | AMG 400uM vs. IFN/TNF+400 uM | <0.0001 | Yes          |
| Appendix Fig 13 | C        | IFN/TNF vs. IFN/TNF+400 uM   | <0.0001 | Yes          |
| Appendix Fig 13 | D        | NT vs. AMG 400uM             | 0.063   | No           |
| Appendix Fig 13 | D        | NT vs. IFN/TNF               | <0.0001 | Yes          |
| Appendix Fig 13 | D        | NT vs. IFN/TNF+400 uM        | <0.0001 | Yes          |
| Appendix Fig 13 | D        | AMG 400uM vs. IFN/TNF        | <0.0001 | Yes          |
| Appendix Fig 13 | D        | AMG 400uM vs. IFN/TNF+400 uM | <0.0001 | Yes          |
| Appendix Fig 13 | D        | IFN/TNF vs. IFN/TNF+400 uM   | 0.0014  | Yes          |

Abbreviations: NT, non-treated. AMG, Aminoguanidine.

**Appendix Table S19. Significance p-values for Appendix Figure 14.**

| Figure          | Panel | Comparison           | p-value | Significant? |
|-----------------|-------|----------------------|---------|--------------|
| Appendix Fig 14 | A     | NT vs. GW10          | 0.0784  | No           |
| Appendix Fig 14 | A     | NT vs. GW100         | 0.0033  | Yes          |
| Appendix Fig 14 | A     | NT vs. IT            | 0.4675  | No           |
| Appendix Fig 14 | A     | NT vs. IT+GW10       | 0.3609  | No           |
| Appendix Fig 14 | A     | NT vs. IT+GW100      | 0.1847  | No           |
| Appendix Fig 14 | A     | GW10 vs. GW100       | 0.1469  | No           |
| Appendix Fig 14 | A     | GW10 vs. IT          | 0.2758  | No           |
| Appendix Fig 14 | A     | GW10 vs. IT+GW10     | 0.3653  | No           |
| Appendix Fig 14 | A     | GW10 vs. IT+GW100    | 0.6321  | No           |
| Appendix Fig 14 | A     | GW100 vs. IT         | 0.0166  | Yes          |
| Appendix Fig 14 | A     | GW100 vs. IT+GW10    | 0.025   | Yes          |
| Appendix Fig 14 | A     | GW100 vs. IT+GW100   | 0.0605  | No           |
| Appendix Fig 14 | A     | IT vs. IT+GW10       | 0.8473  | No           |
| Appendix Fig 14 | A     | IT vs. IT+GW100      | 0.5322  | No           |
| Appendix Fig 14 | A     | IT+GW10 vs. IT+GW100 | 0.664   | No           |
| Appendix Fig 14 | B     | NT vs. GW10          | 0.8279  | No           |
| Appendix Fig 14 | B     | NT vs. GW100         | 0.7165  | No           |
| Appendix Fig 14 | B     | NT vs. IT            | 0.0426  | Yes          |
| Appendix Fig 14 | B     | NT vs. IT+GW10       | 0.0149  | Yes          |
| Appendix Fig 14 | B     | NT vs. IT+GW100      | 0.0351  | Yes          |
| Appendix Fig 14 | B     | GW10 vs. GW100       | 0.8837  | No           |
| Appendix Fig 14 | B     | GW10 vs. IT          | 0.0655  | No           |
| Appendix Fig 14 | B     | GW10 vs. IT+GW10     | 0.0236  | Yes          |
| Appendix Fig 14 | B     | GW10 vs. IT+GW100    | 0.0543  | No           |
| Appendix Fig 14 | B     | GW100 vs. IT         | 0.0865  | No           |
| Appendix Fig 14 | B     | GW100 vs. IT+GW10    | 0.032   | Yes          |
| Appendix Fig 14 | B     | GW100 vs. IT+GW100   | 0.0721  | No           |
| Appendix Fig 14 | B     | IT vs. IT+GW10       | 0.6156  | No           |
| Appendix Fig 14 | B     | IT vs. IT+GW100      | 0.9233  | No           |
| Appendix Fig 14 | B     | IT+GW10 vs. IT+GW100 | 0.6842  | No           |
| Appendix Fig 14 | C     | NT vs. GW10          | 0.2751  | No           |
| Appendix Fig 14 | C     | NT vs. GW100         | 0.3148  | No           |
| Appendix Fig 14 | C     | NT vs. IT            | 0.0174  | Yes          |
| Appendix Fig 14 | C     | NT vs. IT+GW10       | 0.0108  | Yes          |
| Appendix Fig 14 | C     | NT vs. IT+GW100      | 0.0218  | Yes          |
| Appendix Fig 14 | C     | GW10 vs. GW100       | 0.9279  | No           |
| Appendix Fig 14 | C     | GW10 vs. IT          | 0.1527  | No           |
| Appendix Fig 14 | C     | GW10 vs. IT+GW10     | 0.1028  | No           |
| Appendix Fig 14 | C     | GW10 vs. IT+GW100    | 0.1831  | No           |
| Appendix Fig 14 | C     | GW100 vs. IT         | 0.1304  | No           |
| Appendix Fig 14 | C     | GW100 vs. IT+GW10    | 0.087   | No           |

|                 |   |                      |        |    |
|-----------------|---|----------------------|--------|----|
| Appendix Fig 14 | C | GW100 vs. IT+GW100   | 0.1571 | No |
| Appendix Fig 14 | C | IT vs. IT+GW10       | 0.8242 | No |
| Appendix Fig 14 | C | IT vs. IT+GW100      | 0.9147 | No |
| Appendix Fig 14 | C | IT+GW10 vs. IT+GW100 | 0.7422 | No |

Abbreviations: NT, non-treated. GW, GW274150. IT, IFN $\gamma$ /TNF $\alpha$ .
