# Supplementary material for: Pharmacological or genetic inhibition of iNOS prevents cachexia‐mediated muscle wasting and its associated metabolism defects
Source: PubMed Central journal article supplement (PMC8261493; doi:10.15252/emmm.202013591), 2021-06-07

**Source Data file:**

**Figure 1**

Uncropped Blots for Figure 1A

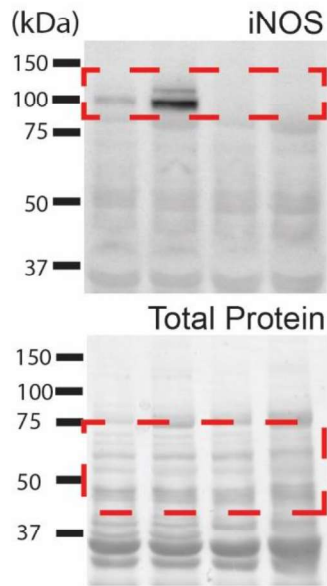

Uncropped Blots for Figure 1B

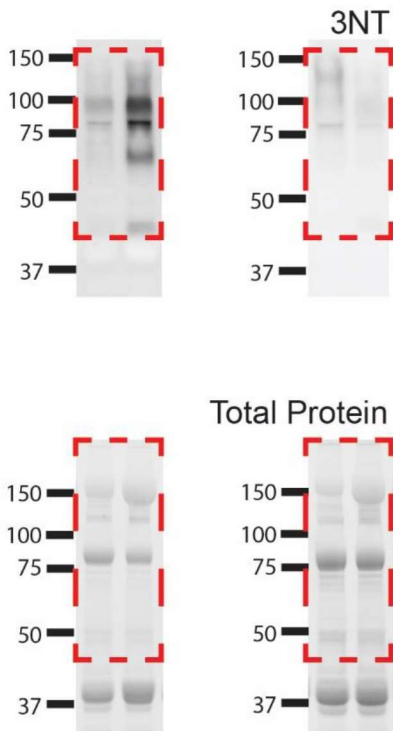

Supplement: EMMM-13-e13591-s008.pdf [file EMMM-13-e13591-s008.pdf]
