# Supplementary material for: Pharmacological or genetic inhibition of iNOS prevents cachexia‐mediated muscle wasting and its associated metabolism defects
Source: PubMed Central journal article supplement (PMC8261493; doi:10.15252/emmm.202013591), 2021-06-07

**Figure 5**

Uncropped Blots for Figure 5C

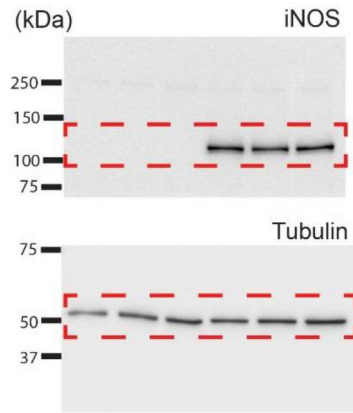

Uncropped Blots for Figure 5E (Top)

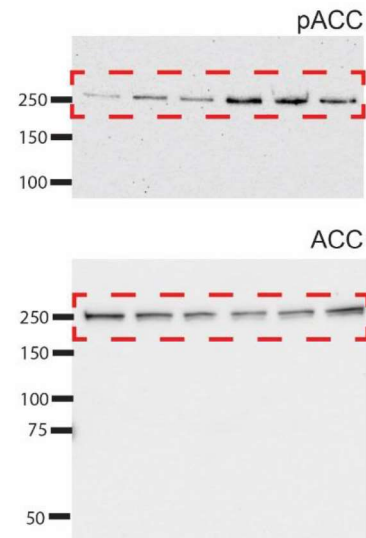

Uncropped Blots for Figure 5H (Top)

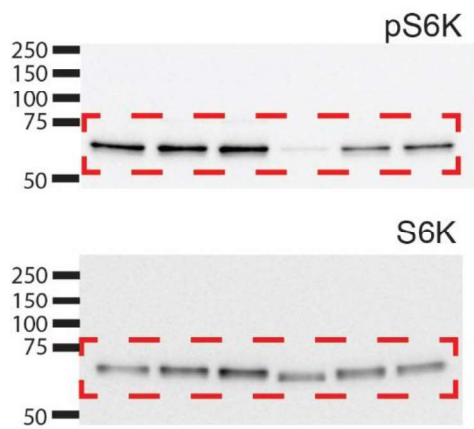

Uncropped Blots for Figure 5E (Bottom)

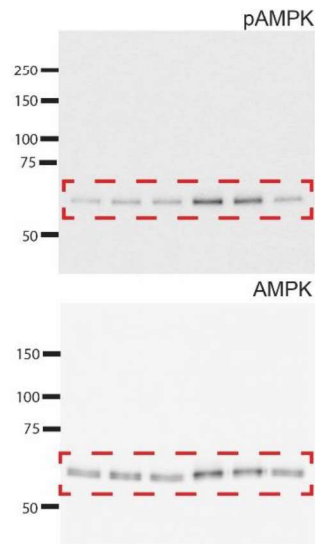

Uncropped Blots for Figure 5H (Bottom)

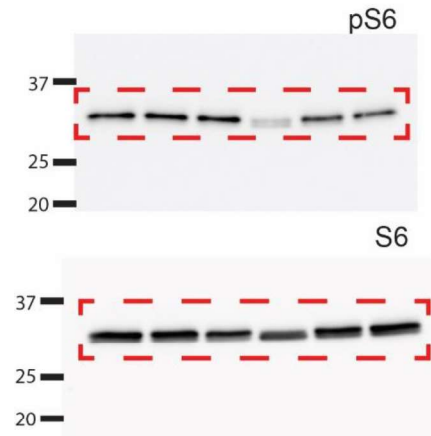

Supplement: EMMM-13-e13591-s012.pdf [file EMMM-13-e13591-s012.pdf]
